RESEARCH ARTICLE

# Arbuscular mycorrhizal strategy for zinc mycoremediation and diminished translocation to shoots and grains in wheat

Abdelghafar M. Abu-Elsaoud<sup>1</sup>\*, Nivien A. Nafady<sup>2</sup>, Ahmed M. Abdel-Azeem<sup>1</sup>

**1** Department of Botany, Faculty of Science, Suez Canal University, Ismailia, Egypt, **2** Department of Botany and Microbiology, Faculty of Science, Assiut University, Assiut, Egypt

\* These authors contributed equally to this work.

\* [AbuElsaoud@science.suez.edu.eg](mailto:AbuElsaoud@science.suez.edu.eg), [Abdoacacia@gmail.com](mailto:Abdoacacia@gmail.com)

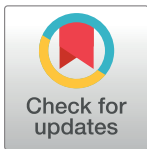

**OPEN ACCESS**

**Citation:** Abu-Elsaoud AM, Nafady NA, Abdel-Azeem AM (2017) Arbuscular mycorrhizal strategy for zinc mycoremediation and diminished translocation to shoots and grains in wheat. PLoS ONE 12(11): e0188220. <https://doi.org/10.1371/journal.pone.0188220>

**Editor:** Ricardo Aroca, Estacion Experimental del Zaidin, SPAIN

**Received:** June 1, 2017

**Accepted:** November 2, 2017

**Published:** November 16, 2017

**Copyright:** © 2017 Abu-Elsaoud et al. This is an open access article distributed under the terms of the [Creative Commons Attribution License](https://creativecommons.org/licenses/by/4.0/), which permits unrestricted use, distribution, and reproduction in any medium, provided the original author and source are credited.

**Data Availability Statement:** All relevant data are within the paper and its Supporting Information files.

**Funding:** The authors received no specific funding for this work.

**Competing interests:** The authors have declared that no competing interests exist.

**Abbreviations:** HMs, heavy metals; MDA, Malondialdehyde; AMF, arbuscular mycorrhizal fungi; NM, non-mycorrhizal; M, mycorrhizal; NS,

## Abstract

Mycoremediation is an on-site remediation strategy, which employs fungi to degrade or sequester contaminants from the environment. The present work focused on the bioremediation of soils contaminated with zinc by the use of a native mycorrhizal fungi (AM) called *Funneliformis geosporum* (Nicol. & Gerd.) Walker & Schüßler. Experiments were performed using *Triticum aestivum* L. cv. Gemmeza-10 at different concentrations of Zn (50, 100, 200 mg kg<sup>-1</sup>) and inoculated with or without *F. geosporum*. The results showed that the dry weight of mycorrhizal wheat increased at Zn stressed plants as compared to the non-Zn-stressed control plants. The concentrations of Zn also had an inhibitory effect on the yield of dry root and shoot of non-mycorrhizal wheat. The photosynthetic pigment fractions were significantly affected by Zn treatments and mycorrhizal inoculation, where in all treatments, the content of the photosynthetic pigment fractions decreased as the Zn concentration increased in the soil. However, the level of minerals of shoots, roots, and grains was greatly influenced by Zn-treatment and by inoculation with *F. geosporum*. Treatment with Zn in the soil increased Cu and Zn concentrations in the root, shoot and grains, however, other minerals (P, S, K, Ca and Fe) concentration was decreased. Inoculation of wheat with AM fungi significantly reduced the accumulation of Zn and depressed its translocation in shoots and grains of wheat. In conclusion, inoculation with a native *F. geosporum*-improves yields of wheat under higher levels of Zn and is possible to be applied for the improvement of zinc contaminated soil.

## Introduction

Heavy metals (HMs) naturally occurring in the environment are not the main source of risk; rather the industrial processing of these elements and their deposition into the environment due to this process [1]. HMs are mainly phytotoxic, either at all levels (e.g. Cd, Pb and As) or above certain threshold concentrations (e.g. Na, K, Cu, Zn, Co, Ca, Mg, Mn and Fe) and cause harmful effects to the environment, by affecting biomass and crop yields, soil fertility and,

none-significant; SEM, Scanning electron microscope; EDX, energy dispersive X-ray; BCF, bioaccumulation factor.

ultimately, human health [2–4]. Increase human health by minimizing the environmental risks posed by the accumulation of several toxic HMs in the soil (e.g., Cu, Cd, Pb, and Zn), accompanied by the high cost of cleaning soil contaminated by HMs [5]. Efforts have been promoted to develop new approaches for soil removal and cleaning of heavy metals by micro-fungi as plant symbionts with enhanced cleaning efficiency [5]. Zinc is an essential plant nutrient and is one of the most ubiquitous trace metals present in the soil. When present at excessive concentrations it is considered as a phytotoxic to plants [6]. Pollution of different ecological habitats by metals is already widespread in Egypt and around the world lead to increase toxicity of plants [7–9]. The transfer of heavy metals to plants through contaminated soil and/or irrigation water is the main route for animals and the human population with dangerous effects [10]. The metals and elements are nondegradable and subsequently accumulate in soils and plants [2, 11]. The exposure of humans to metals came through different pathways, like from soils to plants through the food chain [7]. The prediction of the transfer of metals from the soils of the shoot system through the radical tissues is important to be used in simulation models [12]. The root system is the main input step among plant tissues and its content is directly proportional to the bioavailability of HM levels in soils. The bioavailability of HMs fractions in the soil is largely conditioned by soil pH and determined by many factors like the magnitude of HMs, exposure time, presence or absence of nutrients and other chemical species [13, 14].

In 1996, WHO reported that human zinc poisoning included nausea, vomiting, diarrhea, fever and lethargy, and have typically been observed following the ingestion of 4–8 g of zinc. Kloke [15] recorded normal Zn content intervals in soils 3–50 ( $\text{mg kg}^{-1}$ ), while Nriagu [16] recorded the maximum permissible limits for Zn as 300  $\text{mg kg}^{-1}$ . Excess of 500  $\text{mg kg}^{-1}$  in the soil interferes with the ability of plants to absorb other essential metals, such as iron and manganese [17]. The content of total Zn ( $\text{mg kg}^{-1}$ ) of Egyptian soil samples varied in their characteristics carried out by several researchers ranging from 18.3 to 176  $\text{mg kg}^{-1}$  [18–20].

Mycoremediation (fungal remediation) is an evolutionary approach that can provide environmental benefits in addition to a cost-efficient alternative to other remediation methods [21]. Mycoremediation encompasses the use of fungi in the substantial or partial remediation of certain heavy metal contaminants in contaminated surface and groundwater, industrial wastewater, soil, sediment and sludge [22–24]. The Mycoremediation method is comparatively economical and requires expertise in the design of field projects with technical strategies and to develop a successful strategy of mycoremediation, the correct fungal species should be chosen to target a specific contaminant [25].

In order to bioremediate zinc, researchers have attempted to look for efficient plant species with the ability to accumulate zinc from soils [26, 27]. Macrophytes have been used during the last two decades for the removal of metals [3, 27–30]. Several species of plants manage to coexist and survive in such contaminated soils is a key issue in ecology [31, 32]. Glomeromycota is a group of soil microfungi that form a symbiotic relationship with the root system of terrestrial plants [33]. More than eighty percent of terrestrial plants are in a symbiotic relationship with arbuscular mycorrhizal (AM) fungi [34, 35]. As a consequence of AM colonization, fungi help nourish plants with water and nutrients, promote host resistance to biotic and abiotic stress, and consequently improve overall plant productivity and health [36–40]. The mycorrhizal colonization technique has been carefully introduced in agriculture to provide benefits to cultivated plants, which involves improving plant metabolism, producing secondary metabolites and helping to improve and maintain an optimal soil texture [41]. Inoculation of the Indian wheat genotype to arbuscular mycorrhizal fungi in sandy loam soil indicated better phosphorus absorption, growth and yield consequences in mycorrhizal plants and efficiently saved fertilizer inputs and phosphorus utilization [42]. A meta-analysis on wheat inoculation by

arbuscular mycorrhizal fungi (AMF), comprising 38 published field trials with 333 observations, revealed that AM fungi can benefit wheat crop growth and yield through increased biomass, grain N content, Zn uptake and grain yield by 20% [43].

Mycorrhizal fungi have also been supplemented to fertilizers in order to increase growth and productivity of crops [44]. Several investigations on plants inoculated with mycorrhizae under the impact of bulk metals have demonstrated that host plants were protected against HM stress and toxicity [45, 46]. Mycorrhizal colonization facilitates phytoremediation by promoting the growth of hyperaccumulating plants [40, 47, 48]. However, because of the distinctive physico-chemical characteristics of metal or metal oxide nanoparticles, the impact of these materials could have an inhibitory effect on plant colonization by AM fungi [49].

This study aims to examine the physiological role of a native *Funneliformis geosporum* on the uptake, translocation of Zn and other nutrients in the survival of *Triticum aestivum* as one of the most economical plants in the world.

## Materials and methods

### Sampling, soil analysis and isolation of AMF

Five rhizospheric soil samples were collected randomly from different crops namely: *Hibiscus sabdariffa* L., *Zea mays* L., *Lycopersicon esculentum* L., *Cicer arietinum* L. and *Triticum aestivum* L. from Assiut Governorate, Upper Egypt (26.8333 to 27.6166 N and longitude of 30.6500 to 31.5833 E) for the isolation of AM fungi. Samples were kept in a clean sterile polyethylene bags, labeled and sent to the laboratory within one hour for analysis. The particle size distribution was carried out using the screening method [50]. The content of organic matter was estimated by the method of Walkely and Black [51]. Total calcium carbonates were determined volumetrically by Collin's Calcimeter [52] and chemical characteristics [Cations ( $\text{Na}^+$ ,  $\text{K}^+$ ,  $\text{Mg}^{2+}$ ,  $\text{Ca}^{2+}$ ), anions ( $\text{Cl}^-$ ,  $\text{HCO}_3^-$ ,  $\text{PO}_4^{3-}$ ,  $\text{SO}_4^{2-}$ )], EC and pH were determined in 1:2 soil-water extract according to Jackson [51] and Page [53]. The concentrations of heavy metals (Zn and Fe) were estimated using the total adsorptive metals technique based on USEPA [54] using atomic spectrophotometer (Model PYE-UNICAM SP9, England).

For isolation and examination of AMF from rhizospheric soils, wet sieving and decantation technique was used [55]. AMF taxa were identified according to the relevant keys [56–59] using morphological characteristics of hyphae, bound hyphae, chlamydo spores, azygospores and sporocarp. For root cleaning and staining of mycorrhizae, Philips and Hayman technique was applied [60, 61].

### Plant material

Grains of *Triticum aestivum* L. cv. Gemmeza-10 was sterilized for 1 minute in 75% ethanol and then immersed for 3 minutes in sterile distilled water. The seeds were allowed to dry overnight and then grown in plastic pots (35 cm high x 26 cm wide).

### Experimental design

The experiment was carried out in a greenhouse at Department of Botany and Microbiology, University of Assiut, during the wheat growing season from December to February under ambient light (89.5–85.8 hours of sunshine), temperature (17–26°C) and humidity (43–62%). Soils for mycorrhizal production and artificially polluted experiment were collected from the Botanical garden of Department of Botany and Microbiology, University of Assiut. Soil of loam and sand mixture (2: 1, w/w) was steamy sterilized (121°C for 1 h, for 3 alternate days) packed in 5 Kg soil pot<sup>-1</sup> and set in a completely random design with three replicates. For

artificial pollution, three levels of Zn (50, 100 and 200 mg kg<sup>-1</sup>) were added in the form of ZnCl<sub>2</sub>. Mycorrhizal (M) and non-mycorrhizal (NM) pots were irrigated with tap water when required.

## Mycorrhizal inoculum

*Funneliformis geosporum* (Nicol. & Gerd.) Walker & Schüßler, as a dominant taxon in wheat rhizospheric soils under study, was selected. The selected isolate (*F. geosporum*) was maintained on the onion roots (*Allium cepa* L.) as host plants [62] cultured for three months before the start of the experiment. The inoculum suspension was prepared by wet sieving technique including: colonized root fragment, hyphae and 1000 spores pot<sup>-1</sup>. The freshly prepared suspension was inoculated 3 cm below the wheat grains, while non-mycorrhizal (NM) control group received a similar volume of autoclaved suspensions.

## Growth parameters and grain yield

Three plants were harvested in the late vegetative stage (45 days after sowing) of each pot with a total number of 9 plants. The plants were separated into shoots and roots and a part of the roots and fresh shoots were immediately frozen in liquid nitrogen for analysis. The dry weight of the plant was estimated by placing the samples in an oven at 60°C until obtaining a constant dry weight [63]. In addition, some of wheat were harvested at the ripening stage to record the yield component data, which included: plant height (cm), days to flowering, days to maturity, spike length (cm), grain yield (g plant<sup>-1</sup>), biological yield (g plant<sup>-1</sup>), weight of 100 grams (g), number of grains / spike [64].

## Estimation of photosynthetic pigments

Pigment fractions (chlorophyll-a, chlorophyll-b, and carotenoids) were estimated using the spectrophotometric method as recommended by Lichtenthaler [65].

## Mineral analysis

Three individual randomly selected plants/replica were separated into shoots, roots, and grains, and oven dried at 70°C for two days to determine the elemental concentrations (Zn, P, S, K, Ca, Fe, Cu) using JEOL JSM -5400 LV SEM supplied with a Tracor Northern 5200, energy dispersive X-ray (EDX) analysis system at Electronic Microscope Unit, University of Assiut. The sample powder was analyzed by using EDX unit attached to SEM expressed as an average of three points [66, 67].

The zinc efficiency was evaluated based on three different characteristics according to Yang et al. [68], the bioaccumulation factor (BCF) was calculated according to the following equation [68]:

$$BCF = \frac{C_{Zn\text{-above ground}}}{C_{Zn\text{-Soil}}}$$

In this expression,  $C_{Zn\text{-aboveground}}$  (mg kg<sup>-1</sup>) is the Zn concentration estimated in the aboveground parts of the plant including grains, while  $C_{Zn\text{-soil}}$  (mg kg<sup>-1</sup>) is the Zn concentration in the soil.

Total Zn metal uptake in wheat was calculated as follows [68]:

$$\text{Metal uptake (mg pot}^{-2}\text{)} = C_{\text{metal concentration in plant tissue (mg Kg}^{-1}\text{)}} \times W_{\text{plant dry weight (Kg plant}^{-1}\text{)}} \times n_{\text{number of plants}}$$

The phytoextraction efficiency (%) of *T. aestivum* was calculated using the following equation:

$$\text{Phytoextraction efficiency (\%)} = \frac{C_{\text{Zn in plant tissue (mg kg}^{-1}\text{)}} \times W_{\text{plant dry weight (kg pot}^{-1}\text{)}} \times n_{\text{number of plants}}}{C_{\text{Zn-soil}} \times 5 \text{ Kg pot}^{-1}}$$

### Determination of mycorrhizal colonization rate

Root segments (2 cm) were stained with trypan blue (0.5% w / v) according to the Philips and Hayman method [60]. The intensity of root mycorrhizal colonization (M%), mycorrhizal frequency (F%) and root arbuscular frequency (A%) was calculated according to Trouvelot et al. [69] using the MYCOCALC program [70].

### Determination of lipid peroxidation

Lipid peroxidation was determined based on malondialdehyde (MDA) formation using thio-barbituric acid reaction modified after Rao and Sresty [71].

### Statistical analyses

Statistical analyses were performed using the IBM-SPSS statistical software for Mac OS version 23. One and two-way analysis of variance (ANOVA) were performed to assess the differences between the various treatment groups. Multiple Duncan's multiple range comparisons were also performed. All experiments were performed in triplicates.

## Results

Various physicochemical characteristics of rhizospheric soil samples collected from open fields were analysed and presented in Table 1. The soil texture was clay with a pH ranges from 7.90 to 8.80. The mean electrical conductivity (EC) was  $1.94 \pm 0.09$  mmhos.cm<sup>-1</sup> with a highest absolute value at site no. 5 soil with  $2.04$  mmhos.cm<sup>-1</sup> and the lowest absolute value at site no. 4 soils was  $1.82$  mmhos.cm<sup>-1</sup>. The mean value of organic matter (OM) was  $0.94\% \pm 0.12$ . The mean concentration of available P in the soil samples was  $13.44 \pm 2.56$  mg kg<sup>-1</sup>, while and the mean concentration of Zn was  $1.03 \pm 0.39$  mg kg<sup>-1</sup>.

Analysis of physicochemical properties of loamy sand mixture used in greenhouse experiment showed that texture was limed, pH of  $7.30 \pm 0.12$ , EC was  $3.43 \pm 0.35$  mmhos.cm<sup>-1</sup>, OM, total CaCO<sub>3</sub> and total N were  $14.8 \pm 0.62$ ,  $14.3 \pm 1.27$  and  $1.48 \pm 0.11$  g kg<sup>-1</sup> soil, respectively. The concentration of available P was  $140 \pm 18.03$  mg kg<sup>-1</sup> soil and Zn was  $1.68 \pm 0.21$  mg kg<sup>-1</sup>.

Identified taxa of AM fungi, spore density and colonization rate were recorded and presented in Table 2. Totally, 14 AMF morphotypes were recovered from different plant species. Reported taxa were belonged to class Glomeromycetes belongs to, three orders (Glomerales, Diversisporales, and Archaeosporales). All the isolates were distributed in five families (Glomeraceae, Gigasporaceae, Acaulosporaceae, Entrophosporaceae and Paraglomeraceae). A total of 425 spores and sporocarps were recovered from the 5 collected rhizospheric soil samples. The abundance of AM fungal colonization rate was widely varied from 62 to 90%, with the

**Table 1. pH values, electrical conductivity (EC  $\text{dsm}^{-1}$ ), cations and anions contents (mg/100 g), heavy metal contents (Fe and Zn  $\text{mg kg}^{-1}$ ), phosphorus contents (P;  $\text{mg kg}^{-1}$ ), the percentage of organic matter (OM%) and soils texture of 5 sites of cultivated soils.**

| Soil Parameter                | Sampling sites |        |        |        |        |                  | ANOVA   |         |
|-------------------------------|----------------|--------|--------|--------|--------|------------------|---------|---------|
|                               | Site 1         | Site 2 | Site 3 | Site 4 | Site 5 | Mean $\pm$ SD    | F-ratio | p-value |
| pH                            | 8.07           | 8.09   | 8.80   | 8.23   | 7.90   | 8.22 $\pm$ 0.35  | 2.0     | 0.177   |
| EC                            | 2.01           | 1.89   | 1.92   | 1.82   | 2.04   | 1.94 $\pm$ 0.09  | 13.5*   | <0.001  |
| Ca <sup>++</sup>              | 0.54           | 0.59   | 0.51   | 0.41   | 0.28   | 0.47 $\pm$ 0.12  | 0.3     | 0.878   |
| Mg <sup>++</sup>              | 0.35           | 0.53   | 0.47   | 0.32   | 0.51   | 0.44 $\pm$ 0.10  | 0.1     | 0.965   |
| Na <sup>+</sup>               | 3.29           | 3.49   | 2.98   | 3.19   | 2.79   | 3.15 $\pm$ 0.27  | 1.3     | 0.332   |
| K <sup>+</sup>                | 0.11           | 0.08   | 0.09   | 0.07   | 0.09   | 0.09 $\pm$ 0.01  | 0.0     | 1.000   |
| Cl <sup>-</sup>               | 0.59           | 0.42   | 0.87   | 1.17   | 1.32   | 0.87 $\pm$ 0.38  | 2.3     | 0.128   |
| HCO <sub>3</sub> <sup>+</sup> | 0.20           | 0.21   | 0.31   | 0.25   | 0.35   | 0.26 $\pm$ 0.06  | 0.1     | 0.994   |
| SO <sub>4</sub> <sup>-</sup>  | 1.62           | 2.87   | 3.09   | 1.64   | 3.21   | 2.49 $\pm$ 0.79  | 10.3*   | 0.001   |
| Fe <sup>++</sup>              | 8.29           | 8.50   | 6.73   | 8.25   | 6.72   | 7.70 $\pm$ 0.89  | 13.5*   | <0.001  |
| Zn                            | 0.59           | 1.34   | 1.27   | 1.31   | 0.62   | 1.03 $\pm$ 0.39  | 2.6     | 0.103   |
| P                             | 12.73          | 16.93  | 9.82   | 14.09  | 13.63  | 13.44 $\pm$ 2.56 | 109.7*  | <0.001  |
| OM%                           | 0.95           | 1.08   | 0.85   | 1.03   | 0.79   | 0.94 $\pm$ 0.12  | 0.3     | 0.886   |
| Texture                       | Clay           | Clay   | Clay   | Clay   | Clay   |                  | –       | –       |

Differences between sites were assessed by one-way ANOVA were performed

\* Significant for  $p < 0.05$

<https://doi.org/10.1371/journal.pone.0188220.t001>

highest being recorded at site No. 3 cultivated with *Lycopersicum esculentus* L. and the maximum mean spore density also recorded at site No. 3 (142 spores/ 100 g of soil). The most common species was *F. mosseae* from which it was recorded at all sites, followed by *F. geosporum* (recorded at 4 sites out of five) (Table 2). *Funneliformis geosporum* (Nicol. & Gerd.) Walker & Schüßler, as a most abundant native taxon in wheat rhizospheric soil was selected for further investigation.

The growth rate of *T. aestivum* plants expressed as g plant<sup>-1</sup> of fresh or dry weight of roots or shoots (Fig 1A–1D). The data are shown in Fig 1 indicated that the treatments with Zn of 200 mg kg<sup>-1</sup> significantly ( $p < 0.05$ ) reduced the fresh and dry weights of the roots as compared to the non-mycorrhizal (NM) and mycorrhizal (M) control (Fig 1A and 1B). In non-mycorrhizal plants, a significant reduction in root fresh weight was recorded at a higher Zn concentration, which decreased in the root from 0.51 (g plant<sup>-1</sup>) at the control level to 0.31 (g plant<sup>-1</sup>) at 200 mg kg<sup>-1</sup> Zn and from 4.86 at the control level to 2.31 (g plant<sup>-1</sup>) at 200 mg kg<sup>-1</sup> Zn (Fig 1C and 1D). Inoculation of wheat with AM fungus stimulated the shoot growth, however, this growth stimulation was not significant at compared with the control. The shoot growth at different zinc levels showed a significant effect ( $p < 0.05$ ) of AM fungus inoculation (Fig 1C and 1D). All concentrations of Zn exerted an inhibitory effect on the yield of roots and shoot dry weights of non-mycorrhizal plants; however, inoculation with AM fungi increased root dry weight at different zinc levels (Fig 1).

Wheat yield in response to mycorrhizal inoculation was monitored and presented in Table 3. Two yield parameters, days to maturity and flowering, of mycorrhizal wheat under Zn treatments were significantly lower than their corresponding non-mycorrhizal counterparts (Table 3). The mycorrhizal inoculated wheat untreated with Zn bloom after 62.78 $\pm$ 0.7 days and maturity after 103.22 $\pm$ 1.3 days, while, non-Zn treated plants without mycorrhization require 65.89 $\pm$ 2.4 and 111.33 $\pm$ 0.8 days for flowering and maturity, respectively. At the high level of Zn (200 mg kg<sup>-1</sup>), the non-mycorrhizal wheat required 70.56 $\pm$ 2.6 and 119.33 $\pm$ 3.0 days for flowering and maturity, respectively, whereas in mycorrhizal counterparts they required

**Table 2. Distribution, root colonization (%) and spore density (The number of spores in 100 g soil) of AMF in 5 sites of cultivated soils.**

| Site no. | Plant species                     | Root Colonization (%) | AMF                                                                              | Spore density (SD) |
|----------|-----------------------------------|-----------------------|----------------------------------------------------------------------------------|--------------------|
| 1        | <i>Hibiscus sabdariffa</i> L.     | 64                    | <i>Funneliformis mosseae</i> (T.H. Nicolson & Gerd.) C. Walker & A. Schüßler     | 14                 |
|          |                                   |                       | <i>Rhizophagus antarcticus</i> (Cabello) C. Walker                               | 6                  |
|          |                                   |                       | <i>Glomus caesaris</i> Sieverd. & Oehl                                           | 11                 |
|          |                                   |                       | <i>Paraglomus bolivianum</i> (Sieverd. & Oehl) Oehl & G.A. Silva                 | 10                 |
|          |                                   |                       | <i>Rhizophagus clarus</i> (T.H. Nicolson & N.C. Schenck) C. Walker & A. Schüßler | 17                 |
| 2        | <i>Zea mays</i> L.                | 73                    | <i>Acaulospora laevis</i> Gerd. & Trappe                                         | 17                 |
|          |                                   |                       | <i>Acaulospora rehmi</i> Sieverd. & S. Toro                                      | 3                  |
|          |                                   |                       | <i>Acaulospora thomii</i> Blaszk.                                                | 19                 |
|          |                                   |                       | <i>Acaulospora tuberculata</i> Janos & Trappe                                    | 7                  |
|          |                                   |                       | <i>Funneliformis geosporum</i> (T.H. Nicolson & Gerd.) C. Walker & A. Schüßler   | 6                  |
|          |                                   |                       | <i>Funneliformis mosseae</i> (T.H. Nicolson & Gerd.) C. Walker & A. Schüßler     | 21                 |
|          |                                   |                       | <i>Rhizophagus clarus</i> (T.H. Nicolson & N.C. Schenck) C. Walker & A. Schüßler | 13                 |
| 3        | <i>Lycopersicon esculentum</i> L. | 90                    | <i>Acaulospora laevis</i> Gerd. & Trappe                                         | 24                 |
|          |                                   |                       | <i>Acaulospora splendid</i> Sieverd., Chaverri & I. Rojas                        | 11                 |
|          |                                   |                       | <i>Entrophospora infrequens</i> (I.R. Hall) R.N. Ames & R.W. Schneid.            | 14                 |
|          |                                   |                       | <i>Funneliformis geosporum</i> (T.H. Nicolson & Gerd.) C. Walker & A. Schüßler   | 19                 |
|          |                                   |                       | <i>Funneliformis mosseae</i> (T.H. Nicolson & Gerd.) C. Walker & A. Schüßler     | 28                 |
|          |                                   |                       | <i>Glomus caesaris</i> Sieverd. & Oehl                                           | 7                  |
|          |                                   |                       | <i>Gigaspora gigantea</i> (T.H. Nicolson & Gerd.) Gerd. & Trappe                 | 11                 |
|          |                                   |                       | <i>Rhizophagus clarus</i> (T.H. Nicolson & N.C. Schenck) C. Walker & A. Schüßler | 17                 |
|          |                                   |                       | <i>Scutellospora armeniaca</i> Blaszk.                                           | 11                 |
| 4        | <i>Cicer arietinum</i> L.         | 62                    | <i>Acaulospora tuberculata</i> Janos & Trappe                                    | 6                  |
|          |                                   |                       | <i>Entrophospora infrequens</i> (I.R. Hall) R.N. Ames & R.W. Schneid.            | 19                 |
|          |                                   |                       | <i>Funneliformis geosporum</i> (T.H. Nicolson & Gerd.) C. Walker & A. Schüßler   | 15                 |
|          |                                   |                       | <i>Funneliformis mosseae</i> (T.H. Nicolson & Gerd.) C. Walker & A. Schüßler     | 23                 |
|          |                                   |                       | <i>Rhizophagus clarus</i> (T.H. Nicolson & N.C. Schenck) C. Walker & A. Schüßler | 8                  |
|          |                                   |                       | <i>Paraglomus bolivianum</i> (Sieverd. & Oehl) Oehl & G.A. Silva                 | 9                  |
| 5        | <i>Triticum aestivum</i> L.       | 80                    | <i>Funneliformis geosporum</i> (T.H. Nicolson & Gerd.) C. Walker & A. Schüßler   | 18                 |
|          |                                   |                       | <i>Funneliformis mosseae</i> (T.H. Nicolson & Gerd.) C. Walker & A. Schüßler     | 13                 |
|          |                                   |                       | <i>Gigaspora gigantea</i> (T.H. Nicolson & Gerd.) Gerd. & Trappe                 | 4                  |
|          |                                   |                       | <i>Rhizophagus clarus</i> (T.H. Nicolson & N.C. Schenck) C. Walker & A. Schüßler | 15                 |
|          |                                   |                       | <i>Scutellospora armeniaca</i> Blaszk.                                           | 9                  |
| Total    |                                   |                       |                                                                                  | 425                |

<https://doi.org/10.1371/journal.pone.0188220.t002>

64.33±0.8 and 109.56±1.1 days. In wheat treated with non-mycorrhizal Zn, plant height was significantly lower ( $p < 0.05$ ) than that of mycorrhizal plants treated with Zn. The plant height

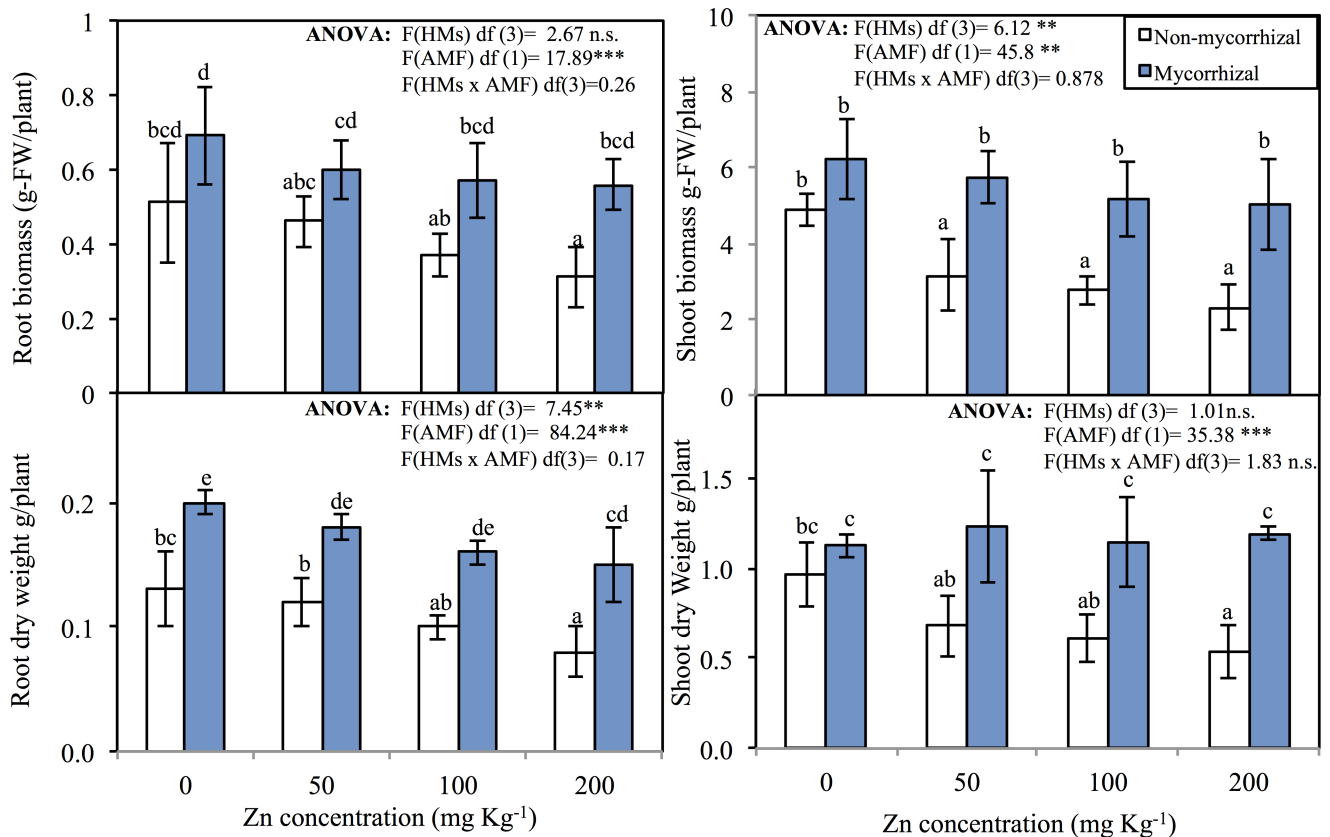

**Fig 1. Fresh and dry weights (g plant<sup>-1</sup>) of roots (A, B) and shoots (C, D) of mycorrhizal and non-mycorrhizal wheat affected by Zn treatments. The data represented are an average of five replicates; error bars represent the standard error for means. ANOVA was carried out to evaluate differences between treatment groups, followed by multiple-rank comparisons of Duncan. Media with similar letters are not significantly different according to Duncan's multiple range comparisons.**

<https://doi.org/10.1371/journal.pone.0188220.g001>

of wheat varied from 62.78 to 52.00 cm in NM wheat treated with 0 to 200 mg kg<sup>-1</sup> Zn (Table 3).

The length of the spikes, number and weight of the grains of wheat had increased by mycorrhizal association under different Zn-treatments. The effect of treatments with Zn on the number of grains/spike or their weights (weight of 1000 grains) was more pronounced at high Zn level (200 mg kg<sup>-1</sup>), where the number of grains spike<sup>-1</sup> reduced to 16±0.9 grains and weight of 1000 grains reached 20.40±0.8 g. The results showed that inoculation of wheat with native AM taxon showed a positive effect on the number of grains/spikes, grain yield, and grain weight. The maximum number of grains/spike (48.78±1.7 grains) recorded at the mycorrhizal (M) control. Data on the 1000 grains weight and grain yield presented in Table 3 showed that the weight of 1000 grains decreased from 36.25±0.4 (at the M control) to 33.96±1.8 grains (at 200 mg kg<sup>-1</sup> Zn) of mycorrhizal wheat. Similarly, the grain yield decreased from 16.17 in mycorrhizal (M) control plants to 12.09 g plant<sup>-1</sup> at M wheat treated with 200 mg kg<sup>-1</sup> Zn (Table 3). The biological yield (g plant<sup>-1</sup>) decreased in NM wheat at different Zn-treatments (0–200 mg Kg<sup>-1</sup>), however it was significantly (*p*<0.05) increased after inoculation with *F. geosporum* as shown in Table 3. The maximum biological yield (25.7±1.9 g plant<sup>-1</sup>) was reported in M wheat at 200 mg kg<sup>-1</sup> Zn, while the minimum biological yield (11.7±0.1 g plant<sup>-1</sup>) was reported in NM wheat at 200 mg kg<sup>-1</sup> Zn.



**Table 3. Yield parameters of wheat in response to mycorrhizal inoculation grown under different levels of Zn.** Data were presented as the mean of three replicates followed by the standard deviation (mean ± SD).

| Treatments                          |       | Days to flowering      | Days to maturity         | Plant height (cm)      | Spike length (cm)     | Grain yield (g plant <sup>-1</sup> ) | Biological yield (g plant <sup>-1</sup> ) | 1000-grain weight (g) | Number of grains per spike |
|-------------------------------------|-------|------------------------|--------------------------|------------------------|-----------------------|--------------------------------------|-------------------------------------------|-----------------------|----------------------------|
| Zn (mg kg <sup>-1</sup> )           | Inoc. |                        |                          |                        |                       |                                      |                                           |                       |                            |
| 0                                   | NM    | 65.9±2.4 <sup>bc</sup> | 111.3±0.8 <sup>abc</sup> | 62.8±2.2 <sup>cd</sup> | 8.9±0.3 <sup>bc</sup> | 10.2±1.3 <sup>bc</sup>               | 17.6±1.2 <sup>ab</sup>                    | 26.7±3.3 <sup>a</sup> | 35.0±2.3 <sup>a</sup>      |
|                                     | M     | 62.8±0.7 <sup>a</sup>  | 103.2±1.3 <sup>ab</sup>  | 68.6±3.2 <sup>e</sup>  | 9.7±0.5 <sup>c</sup>  | 16.2±1.3 <sup>e</sup>                | 20.7±1.1 <sup>c</sup>                     | 36.2±4.0 <sup>b</sup> | 48.7±1.7 <sup>d</sup>      |
| 50                                  | NM    | 68.1±0.7 <sup>c</sup>  | 115.2±0.3 <sup>d</sup>   | 58.8±3.8 <sup>bc</sup> | 8.9±0.5 <sup>bc</sup> | 9.02±1.7 <sup>c</sup>                | 15.7±2.5 <sup>bc</sup>                    | 28.7±3.1 <sup>a</sup> | 30.4±2.8 <sup>a</sup>      |
|                                     | M     | 63.9±0.8 <sup>ab</sup> | 105.2±2.5 <sup>a</sup>   | 71.6±2.4 <sup>e</sup>  | 10.1±0.1 <sup>c</sup> | 15.5±0.9 <sup>e</sup>                | 24.0±0.3 <sup>d</sup>                     | 34.1±0.9 <sup>b</sup> | 44.7±5.0 <sup>cd</sup>     |
| 100                                 | NM    | 69.7±1.1 <sup>c</sup>  | 117.1±2.3 <sup>cd</sup>  | 53.8±1.9 <sup>ab</sup> | 8.3±1.4 <sup>ab</sup> | 8.74±0.6 <sup>ab</sup>               | 13.1±1.2 <sup>a</sup>                     | 26.8±5.1 <sup>a</sup> | 22.8±0.9 <sup>a</sup>      |
|                                     | M     | 64.9±0.8 <sup>ab</sup> | 108.8±1.1 <sup>bc</sup>  | 66.1±2.3 <sup>de</sup> | 10.0±0.5 <sup>c</sup> | 13.9±1.1 <sup>de</sup>               | 23.3±0.5 <sup>d</sup>                     | 35.5±2.3 <sup>b</sup> | 42.6±2.4 <sup>cd</sup>     |
| 200                                 | NM    | 70.6±2.6 <sup>c</sup>  | 119.3±3.0 <sup>d</sup>   | 52.0±0.8 <sup>a</sup>  | 7.3±0.6 <sup>a</sup>  | 7.8±1.0 <sup>a</sup>                 | 11.7±0.1 <sup>a</sup>                     | 20.4±0.8 <sup>a</sup> | 16.0±0.9 <sup>bc</sup>     |
|                                     | M     | 64.3±0.8 <sup>ab</sup> | 109.6±1.1 <sup>b</sup>   | 68.9±5.3 <sup>e</sup>  | 9.9±0.4 <sup>c</sup>  | 12.1±1.3 <sup>d</sup>                | 25.7±1.9 <sup>d</sup>                     | 33.9±1.8 <sup>b</sup> | 40.2±1.4 <sup>ab</sup>     |
| <b>Analysis of variance (ANOVA)</b> |       |                        |                          |                        |                       |                                      |                                           |                       |                            |
| F <sub>Zn</sub>                     |       | 12.21*                 | 22.89*                   | 5.92**                 | 1.87 <sup>NS</sup>    | 3.83*                                | 14.07*                                    | 23.59*                | 52.41**                    |
| F <sub>AMF</sub>                    |       | 39.91**                | 37.34**                  | 92.06**                | 32.02**               | 104.59**                             | 111.74**                                  | 48.12**               | 121.35**                   |
| F <sub>Zn*AMF</sub>                 |       | 20.53*                 | 13.27*                   | 3.41*                  | 11.91*                | 6.86**                               | 7.41**                                    | 32.34*                | 35.21**                    |

One-way ANOVA was performed for each Zn concentration. Means with the same letter and are not significantly different according to Duncan multiple range comparisons. Two-way ANOVA was used to determine the influence of the concentration of AMF and Zn

NS: non—significant ( $p > 0.05$ )

\*—significant ( $p < 0.05$ )

\*\*—highly significant ( $p < 0.01$ ).

<https://doi.org/10.1371/journal.pone.0188220.t003>

The content of photosynthetic pigments (Chl-a, Chl-b, and carotenoids) of mycorrhizae and non-mycorrhizae in leaves of wheat are presented as mg g<sup>-1</sup> of fresh leaf weight as represented in Fig 2A–2C. The present study shows that the fractions of photosynthetic pigments are significantly affected by the treatments with Zn and inoculation of mycorrhizae. In general, with all treatments, the content of the photosynthetic pigment fractions decreased as the Zn concentration increased in the soil. However, the content of photosynthetic pigments of leaves of M wheat was significantly higher ( $p < 0.05$ ) than that of NM ones, of which at control levels of 5.53±0.46 to 3.46±0.45 (mg g<sup>-1</sup> FW) in M and NM leaves wheat, respectively. Carotenoid biosynthesis significantly ( $p < 0.05$ ) reduced by Zn-treatments in NM wheat, while non-significant increase was recorded in M wheat under different Zn levels (Fig 2C). The amount of chlorophyll-a, chlorophyll-b and carotenoids decreased under all Zn-treatments. This effect was more pronounced in the presence of 100 and 200 mg kg<sup>-1</sup> Zn.

EDX analysis showed that the concentration of Zn in wheat’s root, shoots, and grains was linearly correlated with soil Zn concentration (Table 4). However, the rate of Zn accumulation decreased in mycorrhizal wheat (shoot, root, grains). The different plant organs exhibited a different pattern of accumulation, especially at higher levels of Zn. The highest concentration of metal was recorded in the shoots at 100 mg kg<sup>-1</sup> Zn. Inoculation with AMF significantly reduced the accumulation of metals. Significant differences ( $p < 0.05$ ) were observed in the accumulation of zinc in NM and M wheat revealed by one-way ANOVA at each concentration of Zn in the soil. The concentration of zinc in roots increased from 6.42±0.67% in NM control to 47.91±5.96% in NM 200 mg kg<sup>-1</sup> Zn, respectively. Statistical analysis showed that AM fungi significantly ( $p < 0.05$ ) induced a lower accumulation of Zn in wheat roots.

The accumulation of Zn in wheat shoot was significantly ( $p < 0.05$ ) increased as the soil Zn level increased (Table 4). Mycorrhizal wheat recorded a reduced Zn level in shoot significantly ( $p < 0.05$ ). The concentration of accumulated Zn in NM shoots increased significantly at levels 0, 50 and 100 mg kg<sup>-1</sup> of soil added Zn, while decreased at 200 mg kg<sup>-1</sup> of Zn. In the

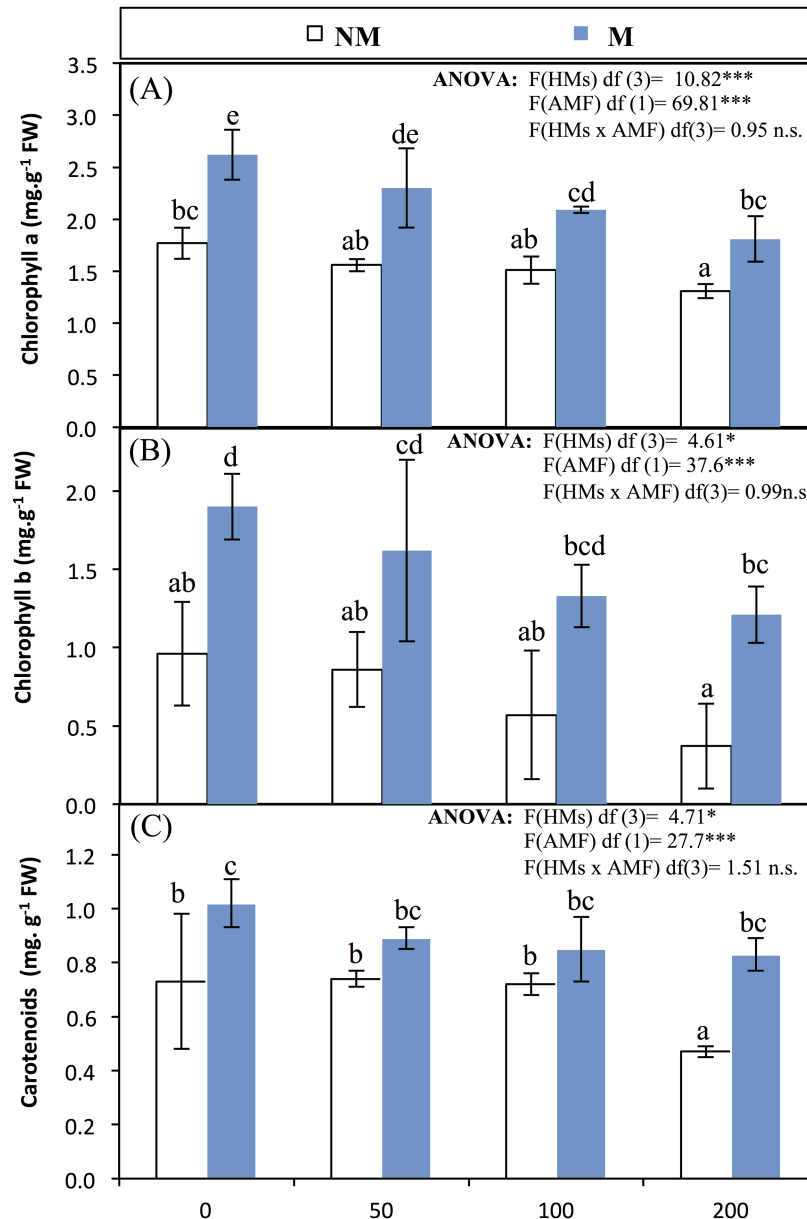

**Fig 2. (A) Chlorophyll-a, (B) Chlorophyll-b, (C) Carotenoid pigment content as mg g<sup>-1</sup> FW of leaves of mycorrhized and non-mycorrhized wheat grown at different levels of treatments with zinc are an average of five replicates, the error bars represent the standard error for the means. ANOVA was performed to assess differences between treatment groups, followed by Duncan's multiple-rank comparisons. Media with similar letters are not significantly different according to Duncan's multiple range comparisons.**

<https://doi.org/10.1371/journal.pone.0188220.g002>

mycorrhizal shoots, the Zn content ranges from 10.09±5.64 to 20.89±5.77% at 0 and 200 mg kg<sup>-1</sup> of Zn, respectively. NM wheat treated with 200 mg kg<sup>-1</sup> of Zn had a significantly higher (*p*<0.05) accumulation rate of in grains in comparison with mycorrhizal wheat. EDX spectra recorded lower accumulation of Zn in M wheat grains than that of NM (Table 4).

The metal uptake of Zn increased in wheat (NM, M) with increasing amounts of Zn added to the soil, however, the bioaccumulation factor and phytoextraction efficiency decreased with increasing the amount of Zn. Inoculation of mycorrhizae lowered the metal uptake of Zn significantly (*p*<0.05) as compared to the NM wheat at all Zn levels (Table 5). The data plotted in

Fig 3 indicated that the Zn translocation was increased at all Zn levels as compared to the control with special reference to non-mycorrhizal wheat. Both AM inoculation and Zn addition had a significant effect on metal uptake, bioaccumulation factor, and interactions between them were also significant in case of metal uptake (Table 5), however, Zn addition had a significant effect on the phytoextraction efficiency. Zn treatment of 0 and 200 mg kg<sup>-1</sup> induced a significant increase in the metal uptake from 228.53±41.53 to 755.32±198.7 g pot<sup>-1</sup>, and from 213.83±27.24 to 666.77±67.18 g pot<sup>-1</sup> in NM and M wheat, respectively. In addition, the phytoextraction decreased significantly with Zn concentration of M and NM wheat, however, in mycorrhizal wheat phytoextraction decreased markedly (Table 5).

The nutrient content (P, S, K, Ca, Fe, Cu, and Zn) in the roots was presented in Table 4. A slight decrease in the concentration of P, K, and S in the NM wheat treated with Zn. There were significant differences in P concentration between M and NM wheat treated with Zn in which M: NM ratio for P ranged from 1.94 to 6.14 for all cases. Inoculation of native mycorrhizae increased the concentration of P in the roots significantly of which 5.57±1.54, 8.62±1.57, 7.09±1.82 and 10.56±1.51% at all levels of Zn (0, 50, 100, and 200 mg kg<sup>-1</sup>) respectively. While, in the NM roots P reached a level of 2.87±1.85, 3.11±1.02, 2.22±2.61, 1.72±0.06% at the same Zn levels, respectively (Table 4). Mycorrhizal inoculated wheat showed higher Ca content than NM in roots at Zn level of 0, 50 and 100 mg kg<sup>-1</sup> (Table 4). Mycorrhizal inoculation induced significant differences in Cu accumulation in roots. The Cu accumulation was decreased in M than NM roots at Zn levels of 50, 100 and 200 mg kg<sup>-1</sup>; respectively. The concentration of Fe in the M roots increased significantly against corresponding NM ones and recorded a level of 42.56±6.65, 54.52±3.27, 48.59±5.56, 47.91±2.74% at 0, 50, 100 and 200 mg kg<sup>-1</sup> Zn, respectively.

A significant maximum level of P (16.96±2.08%) in shoots was recorded in wheat inoculated with *F. geosporum* at 50 mg kg<sup>-1</sup> of Zn, whereas at 100 and 200 mg kg<sup>-1</sup> Zn reached level of 12.41±1.96% and 12.47±4.06%, respectively. In NM wheat shoots, total P uptake decreased recording a level of 5.80±3.14, 4.21±1.69, 2.25±0.20 and 2.13±1.92% with the increasing of Zn levels from 0 to 200 mg kg<sup>-1</sup>, respectively. The M: NM ratio for P uptake ranged from 1.11 to 5.85 for all Zn treatments. A slight decrease in concentration of Fe and S in M wheat shoots at different Zn levels was observed (Table 4). A non-significant difference was observed in Cu concentration between NM and M wheat shoots with 0 level Zn. Cu concentration decreased significantly in M wheat shoots than NM at different Zn levels 50, 100, 200 mg kg<sup>-1</sup>, respectively. The concentration of K in shoots decreased significantly ( $p < 0.05$ ) in NM wheat (Table 4) reached 6.98±1.11% at high Zn level. Likewise, the Ca content of shoots of non-mycorrhizal plants reached 20.88±3.72, 2.45±0.52, 0.71±0.74 and 3.50±0.92% at 0, 50, 100 and 200 mg kg<sup>-1</sup> Zn, respectively. While in M wheat shoot, it varied from 26.79±10.8 to 11.23±6.30% to 0 and 200 mg kg<sup>-1</sup> Zn, respectively (Table 4).

Zinc treatments stimulated *F. geosporum* root colonization intensity (M%), root colonization frequencies (F%), and arbuscular development (A%) in wheat roots in different growth stages (Table 6). Microscopic examination revealed that NM roots were not colonized by AM fungi (S1 Fig). Mycorrhizal colonization in terms of F%, M%, and A% were higher at all levels Zn treatments compared to 0 Zn level in the vegetative stage after 45 days (Table 6). However, in the flowering stage (90 days), mycorrhizal colonization increased at all levels of Zn treatments compared to the vegetative stage. At 0 Zn treatment the F% was ranged from 36±2.1 to 62.3±2.0%, while A% increased non-significantly from 16.7±4.1 to 51.4±4.8% in vegetative and maturity stages, respectively (Table 6). The intensity of mycorrhizal colonization was variable and strongly influenced by Zn treatments. The results in Table 6 indicate that the increase in Zn concentrations induced a dose dependent fluctuating effect on mycorrhizal colonization.

**Table 4. Mineral content in shoots, roots, and grains of wheat grown under different levels of zinc. The data represented are an average of three replicates ± standard deviation.**

| Plant Tissue/ Heavy metals treatment (mg kg <sup>-1</sup> ) | AM              | Mineral concentration (%) |               |               |              |               |               |              |  |  |  |
|-------------------------------------------------------------|-----------------|---------------------------|---------------|---------------|--------------|---------------|---------------|--------------|--|--|--|
|                                                             |                 | P                         | S             | K             | Ca           | Fe            | Cu            | Zn           |  |  |  |
| Root                                                        | 0               | 2.87±1.86 ab              | 3.14±0.28 c   | 11.13±0.17 cd | 18.83±0.24 b | 54.25±3.31 de | 3.36±0.65 a   | 6.42±0.67 a  |  |  |  |
|                                                             | M               | 5.57±1.54 c               | 2.88±0.56 c   | 12.72±3.03 d  | 22.97±9.26 b | 42.56±6.65 c  | 7.47±6.10 ab  | 5.83±3.39 b  |  |  |  |
|                                                             | 50              | 3.11±1.02 a               | 0.17±0.08 a   | 7.47±2.83 bc  | 1.83±0.15 a  | 20.92±0.65 b  | 35.55±2.26 d  | 31.33±2.04 d |  |  |  |
|                                                             | M               | 8.62±1.58 ab              | 1.37±0.21 b   | 10.05±3.16 cd | 17.94±2.33 b | 54.52±3.28 e  | 3.99±1.13 a   | 4.11±0.41 ab |  |  |  |
|                                                             | 100             | 2.22±2.62 ab              | 1.21±1.58 ab  | 4.87±1.76 ab  | 5.66±2.27 a  | 6.66±3.57 a   | 34.55±4.55 d  | 46.56±2.66 e |  |  |  |
|                                                             | M               | 7.09±1.82 bc              | 0.23±0.08 a   | 5.48±0.25 ab  | 6.77±0.45 a  | 48.59±5.56 d  | 15.59±2.70 c  | 16.24±2.39 c |  |  |  |
|                                                             | 200             | 1.72±0.57 a               | 0.17±0.06 a   | 1.89±0.09 a   | 8.35±2.24 a  | 2.62±0.20 a   | 37.00±3.62 e  | 47.91±5.96 e |  |  |  |
|                                                             | M               | 10.56±1.51 c              | 0.06±0.04 a   | 4.44±2.98 a   | 6.39±3.65 a  | 47.91±2.74 de | 13.11±3.22 bc | 17.74±1.40 c |  |  |  |
|                                                             | Two-Way ANOVA   |                           |               |               |              |               |               |              |  |  |  |
|                                                             | All (df = 7)    | 15.34***                  | 12.71***      | 9.64***       | 22.12***     | 66.99***      | 63.46***      | 66.42***     |  |  |  |
| Shoot                                                       | 0               | 5.80±3.14 b               | 5.80±1.84 d   | 28.13±3.76 c  | 20.88±3.72 b | 24.78±6.88 a  | 3.03±0.86 a   | 11.58±0.3 a  |  |  |  |
|                                                             | M               | 6.41±1.43 c               | 6.12±0.69 d   | 20.50±0.36 a  | 26.79±10.8 d | 25.90±4.65 a  | 4.18±1.11 a   | 10.09±5.6 ab |  |  |  |
|                                                             | 50              | 4.21±1.69 a               | 1.33±0.66 a   | 8.02±0.68 a   | 2.45±0.52 ab | 10.67±1.01 a  | 36.65±5.58 c  | 36.66±3.58 d |  |  |  |
|                                                             | M               | 16.96±2.09 c              | 5.85±1.30 cd  | 17.63±6.16 a  | 15.13±2.52 d | 20.75±0.14 a  | 9.21±3.95 a   | 14.46±0.42 b |  |  |  |
|                                                             | 100             | 2.25±0.20 a               | 0.32±0.15 a   | 4.42±1.11 a   | 0.71±0.74 a  | 5.30±2.54 a   | 38.11±5.15 d  | 48.88±5.24 e |  |  |  |
|                                                             | M               | 12.41±1.97 c              | 4.18±0.82 b   | 21.81±3.57 b  | 4.54±2.41 ab | 18.81±2.40 b  | 20.0 ±8.27 b  | 18.91±6.86 c |  |  |  |
|                                                             | 200             | 2.13±1.92 a               | 1.01±0.39 a   | 6.98±1.11 a   | 3.5±0.92 ab  | 7.38±2.74 a   | 33.02±2.87 c  | 45.98±3.1 d  |  |  |  |
|                                                             | M               | 12.47±4.06 b              | 4.55±1.07 b   | 16.10±1.39 b  | 11.23±6.3 c  | 15.59±7.12 ab | 19.18±8.63 b  | 20.89±5.7 c  |  |  |  |
|                                                             | Two-Way ANOVA   |                           |               |               |              |               |               |              |  |  |  |
|                                                             | All (df = 7)    | 21.75***                  | 30.41***      | 37.60***      | 70.67***     | 4.02**        | 129.24***     | 405.82***    |  |  |  |
| Grain                                                       | 0               | 6.90±0.79 abc             | 2.88±0.56 ab  | 12.72±3.03 a  | 32.9±19.9 bc | 31.23±5.74 b  | 10.8±5.99 a   | 5.83±3.39 bc |  |  |  |
|                                                             | M               | 11.78±5.08 c              | 14.63±8.16 d  | 36.59±11.4 b  | 13.0±10.2 bc | 16.89±11.74 a | 4.86±1.17 a   | 2.22±0.81 a  |  |  |  |
|                                                             | 50              | 3.64±4.59 ab              | 1.95±1.93 ab  | 8.07±10.47 a  | 1.91±2.52 a  | 2.61±2.10 a   | 47.1±16.3 bc  | 34.33±3.26 e |  |  |  |
|                                                             | M               | 8.22±0.53 bc              | 10.11±0.3 cd  | 36.34±11.1 b  | 22.14±2.67 c | 11.71±8.12 a  | 6.47±3.91 a   | 4.01±0.20 ab |  |  |  |
|                                                             | 100             | 2.35±0.41 a               | 0.72±0.77 a   | 1.48±1.06 a   | 1.11±0.56 a  | 0.273±0.08 a  | 53.05±2.7 c   | 40.71±1.00 f |  |  |  |
|                                                             | M               | 6.95±7.0 abc              | 10.09±3.3 bc  | 13.87±8.62 a  | 6.63±3.10 a  | 30.03±8.78 a  | 20.73±9.8 bc  | 11.71±3.9 cd |  |  |  |
|                                                             | 200             | 5.32±0.5 abc              | 4.16±1.07 abc | 9.87±2.74 a   | 3.96±0.56 a  | 2.99±3.55 a   | 31.74±3.37 b  | 42.55±6.01 e |  |  |  |
|                                                             | M               | 10.16±2.0 bc              | 8.15±1.23 bc  | 31.27±5.73 b  | 10.76±3.03 a | 5.42±2.78 a   | 18.39±6.43 a  | 16.19±1.76 d |  |  |  |
|                                                             | Two-Way ANOVA   |                           |               |               |              |               |               |              |  |  |  |
|                                                             | All (df = 7)    | 2.92*                     | 6.01***       | 8.65***       | 4.63**       | 23.53***      | 16.63***      | 48.05***     |  |  |  |
| HM* AM (df = 3)                                             | HM (df = 3)     | 2.64n.s.                  | 1.09n.s.      | 5.67**        | 5.62**       | 24.89***      | 25.39***      | 42.07***     |  |  |  |
|                                                             | AM (df = 1)     | 12.3**                    | 33.01***      | 40.14***      | 7.11*        | 15.75***      | 23.57**       | 174.39***    |  |  |  |
|                                                             | HM* AM (df = 3) | 0.068n.s.                 | 1.92n.s.      | 1.12 n.s.     | 2.81n.s.     | 24.76***      | 5.54**        | 11.92***     |  |  |  |

Means with similar letters are not significantly different according to Duncan's multiple range comparisons and bi-directional ANOVA

\* Significant at p<0.05

\*\* very significant at p<0.01

\*\*\* very high significant at p<0.001; AM: arbuscular mycorrhiza

**Table 5. The phytoextraction efficiency (%), metal uptake (g pot<sup>-1</sup>), and bioaccumulation factor (BCF) of Zn of wheat subjected to zinc treatments.** Data presented as the mean of three replicates followed by the standard deviation (Mean±SD).

| Treatment                 |              | Zinc                     |                               |                              |
|---------------------------|--------------|--------------------------|-------------------------------|------------------------------|
| Zn (mg kg <sup>-1</sup> ) | Inoculation. | Phytoextraction          | Metal uptake                  | Bioaccumulation factor (BCF) |
| 0                         | NM           | 9.07 ± 1.64 <sup>b</sup> | 228.53 ± 41.33 <sup>a</sup>   | 14.19 ± 1.79 <sup>c</sup>    |
|                           | M            | 8.49 ± 1.08 <sup>b</sup> | 213.83 ± 27.24 <sup>a</sup>   | 10.80 ± 1.82 <sup>b</sup>    |
| 50                        | NM           | 0.96 ± 0.27 <sup>a</sup> | 745.29 ± 210.5 <sup>c</sup>   | 1.98 ± 0.14 <sup>a</sup>     |
|                           | M            | 0.37 ± 0.09 <sup>a</sup> | 288.50 ± 68.11 <sup>ab</sup>  | 0.44 ± 0.01 <sup>a</sup>     |
| 100                       | NM           | 0.57 ± 0.13 <sup>a</sup> | 869.26 ± 205.7 <sup>c</sup>   | 1.34 ± 0.08 <sup>a</sup>     |
|                           | M            | 0.36 ± 0.07 <sup>a</sup> | 547.24 ± 103.2 <sup>abc</sup> | 0.46 ± 0.08 <sup>a</sup>     |
| 200                       | NM           | 0.25 ± 0.07 <sup>a</sup> | 755.32 ± 198.7 <sup>c</sup>   | 0.68 ± 0.04 <sup>a</sup>     |
|                           | M            | 0.22 ± 0.02 <sup>a</sup> | 666.77 ± 67.18 <sup>bc</sup>  | 0.27 ± 0.02 <sup>a</sup>     |
| <b>ANOVA</b>              |              |                          |                               |                              |
| <b>F<sub>Zn</sub></b>     |              | 209.06 **                | 17.225**                      | 248.18 **                    |
| <b>F<sub>AMF</sub></b>    |              | 1.51 NS                  | 15.73**                       | 17.624 **                    |
| <b>F<sub>Zn*AMF</sub></b> |              | 0.236 NS                 | 3.394*                        | 3.123 NS                     |

Statistical analysis was performed by two-way ANOVA

NS: not significant ( $p > 0.05$ )

\*—significant ( $p < 0.05$ )

\*\*—highly significant ( $p < 0.01$ ) according to the MSTATC test.

<https://doi.org/10.1371/journal.pone.0188220.t005>

Lipid peroxidation was estimated in terms of Malondialdehyde (MDA) and its content in NM and M wheat increased significantly ( $p < 0.05$ ) with the increasing zinc level of 0 to 50, 100, 200 mg kg<sup>-1</sup> (Fig 4). The level of lipid peroxidation ranged from 25.38±1.34 to 115.52±4.6 in non-mycorrhizal wheat; in mycorrhizal plants ranged from 24.23±0.43 to 47.35±3.78 (Fig 4). Mycorrhizal inoculation with *F. geosporum* significantly ( $p < 0.05$ ) decreased cellular lipid peroxidation in wheat in terms of MDA revealed by Duncan’s multiple range comparisons.

## Discussion

Our data demonstrated that arbuscular mycorrhizae were successfully colonized and the frequency of root colonization was increased with zinc treatments. The photosynthetic pigment fractions were significantly affected by Zn treatments and mycorrhizal inoculation, where in all treatments, the content of the photosynthetic pigment fractions decreased as the Zn concentration increased in the soil. The dry weight of mycorrhizal wheat increases at all levels of Zn compared to the 0 mg Kg<sup>-1</sup> Zn level. Inoculation with *F. geosporum* improved the growth and yield of wheat under higher levels of Zn and can be applied to improve soils contaminated with zinc. The decrease in chlorophyll content, as an index to assess photosynthesis, in wheat plants as a result of Zn deficiency has also been reported by several authors and in other plant species [72]. The increase in photosynthetic pigments as a result of mycorrhizal colonization was also supported by Sánchez-Blanco et al. [73] and Wu and Xia [74]. The present results indicate that the application of AM helps the plants to counter photodamage and the photoinhibition of pigments under stress conditions. Increased carotenoid content, as a protective scenario, can directly deactivate singlet oxygen (<sup>1</sup>O<sub>2</sub>) to protect the photosynthetic apparatus against photoinhibition damage and can also extinguish excited <sup>3</sup>Chl\*, i.e. triple chlorophyll status [75,76]. The higher content of chlorophyll in mycorrhizal (M) plants than non-mycorrhizal (NM) plants has sometimes been related to a higher rate of photosynthesis or due to the

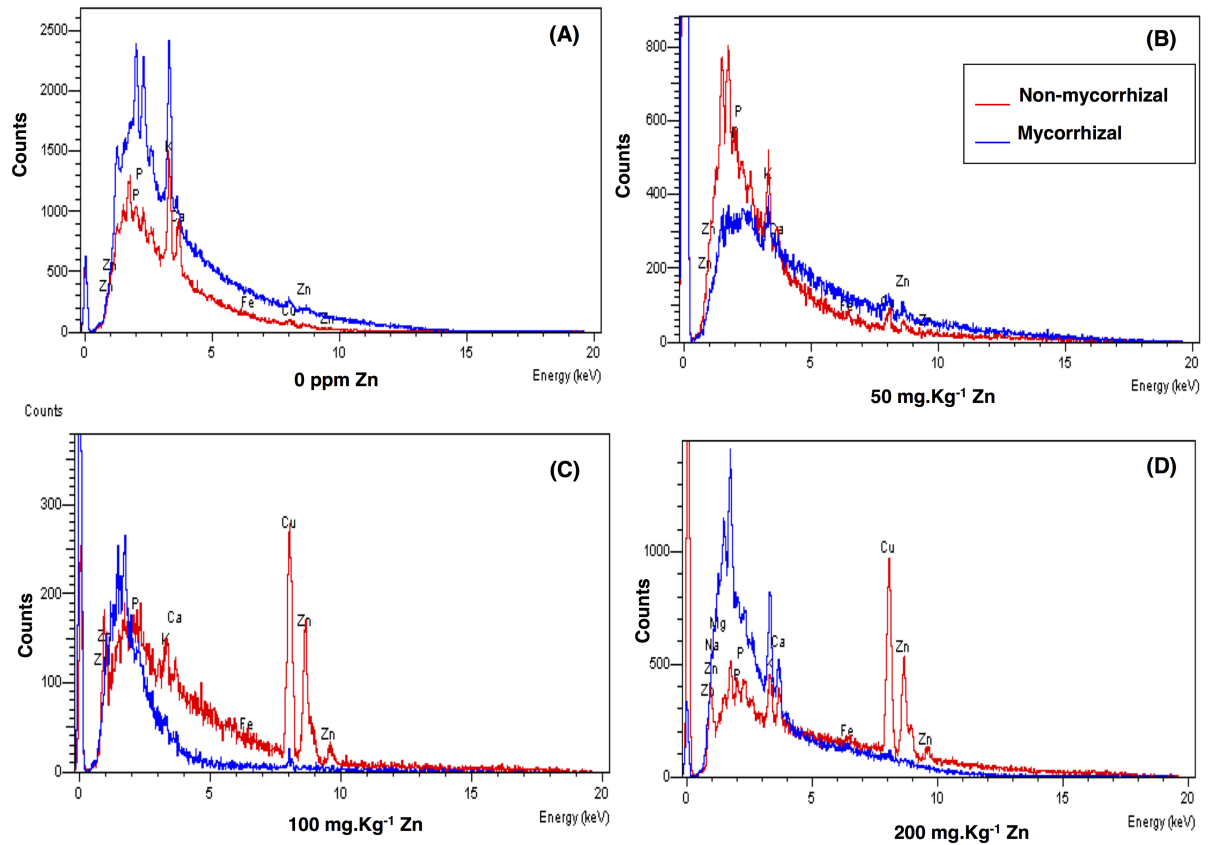

**Fig 3.** EDX spectra of wheat grains grown on soils contaminated with different levels of Zn, (A) 0 mg kg<sup>-1</sup> Zn; (B) 50 mg kg<sup>-1</sup> Zn; (C) 100 mg kg<sup>-1</sup> Zn and (D) 200 mg kg<sup>-1</sup> Zn.

<https://doi.org/10.1371/journal.pone.0188220.g003>

**Table 6. Influence of different levels of Zn on the mycorrhizal colonization of wheat.** F% Frequency of mycorrhizal root segments, M% intensity of mycorrhizal colonization in the root, A% arbuscular frequency in the roots. The data represented are an average of three replicates (mean ± SD) followed by one standard deviation.

| Growth stages                             |     | Treatments with Zn (mg kg <sup>-1</sup> ) |                         |                        |                        | R Coeff.  | ANOVA (F-ratio) |
|-------------------------------------------|-----|-------------------------------------------|-------------------------|------------------------|------------------------|-----------|-----------------|
|                                           |     | 0                                         | 50                      | 100                    | 200                    |           |                 |
| Vegetative<br>(45 days after germination) | F % | 36.0±2.10 <sup>a</sup>                    | 48.0±5.03 <sup>b</sup>  | 52.0±4.36 <sup>b</sup> | 53.0±1.11 <sup>b</sup> | 0.78**    | 15.6**          |
|                                           | M % | 22.3±2.85 <sup>ab</sup>                   | 29.3±4.34 <sup>b</sup>  | 19.0±3.61 <sup>a</sup> | 16.0±3.36 <sup>a</sup> | -0.71**   | 10.9**          |
|                                           | A % | 16.7±4.10 <sup>a</sup>                    | 19.0±5.02 <sup>a</sup>  | 13.0±3.61 <sup>a</sup> | 8.0±5.68 <sup>a</sup>  | -0.32n.s. | 0.7 n.s.        |
| Flowering<br>(70 days after germination)  | F % | 42.0±4.19 <sup>a</sup>                    | 62.0±4.58 <sup>b</sup>  | 67.0±3.90 <sup>b</sup> | 59.0±10.8 <sup>b</sup> | 0.47n.s.  | 18.7**          |
|                                           | M % | 34.0±3.01 <sup>a</sup>                    | 52.0±6.00 <sup>b</sup>  | 58.0±7.69 <sup>b</sup> | 49.0±3.88 <sup>b</sup> | 0.47n.s.  | 14.8**          |
|                                           | A % | 38.0±4.44 <sup>a</sup>                    | 36.3±2.82 <sup>a</sup>  | 42.3±5.41 <sup>a</sup> | 35.6±3.60 <sup>a</sup> | 0.02n.s.  | 0.7 n.s.        |
| Maturity<br>(119 days after germination)  | F % | 62.3±2.00 <sup>a</sup>                    | 82.3±3.25 <sup>bc</sup> | 85.0±5.13 <sup>c</sup> | 75.0±6.25 <sup>b</sup> | 0.33n.s.  | 27.5**          |
|                                           | M % | 55.2±1.73 <sup>a</sup>                    | 58.9±3.61 <sup>a</sup>  | 61.3±2.08 <sup>a</sup> | 53.4±2.06 <sup>a</sup> | -0.05n.s. | 0.8n.s.         |
|                                           | A % | 51.4±4.84 <sup>a</sup>                    | 53.8±6.25 <sup>a</sup>  | 59.4±3.61 <sup>a</sup> | 59.3±9.50 <sup>a</sup> | 0.49n.s.  | 1.3n.s.         |

Means in the same row with similar letters are not significantly different according to the Duncan and ANOVA multiple range comparisons. Spearman rank correlation was performed against different treatment concentrations representing the Spearman correlation coefficient and the significance of two tails.

\* Significant at  $p < 0.05$

\*\* significant at  $p < 0.01$

n.s. non-significant at  $p > 0.05$ .

<https://doi.org/10.1371/journal.pone.0188220.t006>

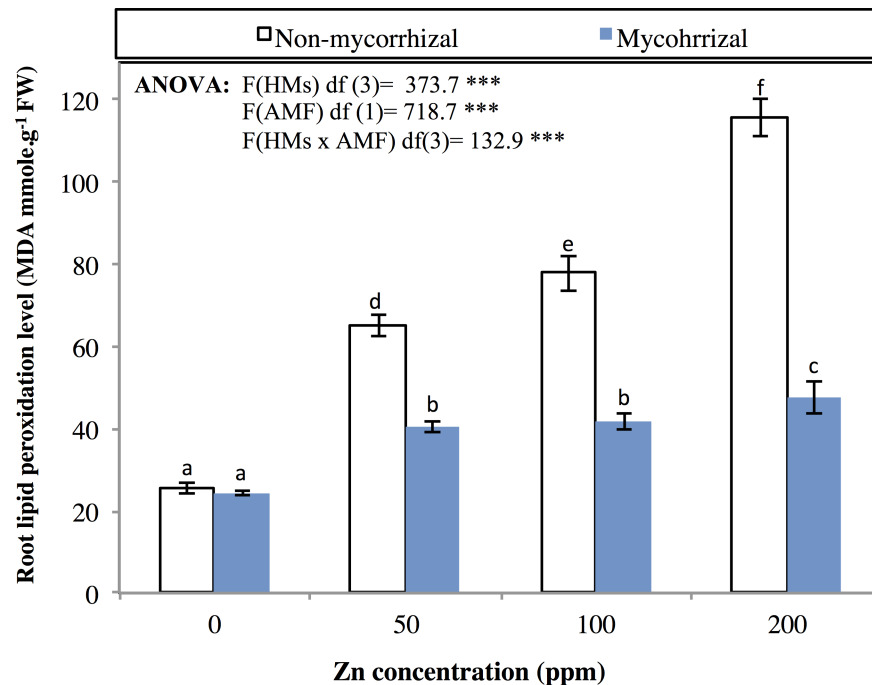

**Fig 4. Influence of mycorrhizal colonization on lipid peroxidation as MDA (mmole g<sup>-1</sup> FW).** The data represented are an average of five replicates; the error bars represent a standard error for the means. ANOVA was performed to assess differences between treatment groups, followed by Duncan's multiple-rank comparisons. Media with similar letters are not significantly different according to Duncan's multiple range comparisons.

<https://doi.org/10.1371/journal.pone.0188220.g004>

increase of N and Mg contents (main components of chlorophyll molecules) in the mycorrhizal plants [77].

The concentrations of minerals in shoots, roots, and grains were influenced to a great extent by the treatment with zinc and inoculation with the native mycorrhizal fungus *F. geosporum*. Treatment with Zn in the soil increased the concentrations of Zn and Cu in the root; the tissues of the shoots and the grains of all the plants studied, while the treatment with zinc decreased the other minerals (P, S, K, Ca and Fe) in the tissues of shoots, roots and grains. Zn and P are observed to interact and may interfere with the availability and utilization of others [78]. The high Zn uptake efficiency is inversely proportional to the P uptake in the root system and may imply a high rate of Zn transport from the roots to the shoot through the xylem, which may hinder the translocation of P from the roots to shoots [78, 79]. Our conclusion is in agreement with other studies carried out by Samreen et al. [78] and Zhu et al. [79]. The application of zinc may have opposite influence on iron content (Fe) and absorption in plants. The competitive interaction with zinc can cause the decrease of Fe and other mineral ions absorption in the root system. Similar findings for the competitive interaction between Zn and other minerals were reported by Loneragan and Webb [80], Rajaie et al. [81] and Samreen et al. [78]. Zn strongly affects the metabolic function of iron in plants; excess of one can depress the absorption of others.

Shoot of mycorrhizal wheat had higher concentrations of P, K, Ca, S and Fe than non-mycorrhizal (NM) plants; however, Cu and Zn were present in low concentrations in root and shoot systems of mycorrhizal wheat. These findings are also supported by several reports in which mycorrhizal inoculation can increase the plant growth under different Zn levels by increasing nutrient uptake; e.g. P [82–84]; K [85, 86]. However, Cu and Zn were lower in

roots, shoots and grains of mycorrhizal plants than non-mycorrhizal [87, 88]. While, in other studies, Zn were found to increase and accumulate in the roots of AM inoculated plants [89, 90] and copper [83]. Reports on the accumulation of metals at high levels indicate that there are differences in metal accumulation and inter-plant translocation depending on the mycorrhizal fungal species, root system density, host-plant, soil characteristics, metals and metals availability [91, 92].

Arbuscular mycorrhizal inoculation is recognized to alleviate the abiotic stress of heavy metals in plants [61, 93, 94]. Navarro-Ródenas et al. [95] noted that inoculation of *Citrus* root stocks with AM and irrigated with saline water, showed a significant increase in the growth of inoculated plants than NM *Citrus* irrigated with non-saline water. The mechanism by which the inoculation of arbuscular mycorrhizae increases the tolerance of the plants to diverse abiotic tensions, salinity, drought and heavy metal stress is mostly nutritional mechanism [93, 95–97] demonstrated that both P fertilization and AM inoculation of plants significantly improved plant growth in soils contaminated with HMs. Aforementioned authors concluded that AM fungi increase plant tolerance to heavy metal stresses mainly through phosphorus nutrition. Non-nutritional mechanisms by which AM fungi increase plant tolerance to abiotic stress e.g. drought implies: changes in hormone levels, improved soil water status, delayed soil drying, improvement of hyphal soil, increased photosynthetic rate and accumulation of various compatible osmolytes [96–98]. Immobilization of heavy metals in mycorrhizal structures and biomass (e.g. in the vesicle, cell wall and glycoprotein (glomalin)) can be considered as a non-nutritional mechanism by which mycorrhizal inoculation improve the plant tolerance to abiotic stress of heavy metals [61].

## Conclusions

The present study focused on the bioremediation of soils contaminated with zinc by using a strategy that included the selection of a native mycorrhizal taxon that was successfully colonized with wheat roots. Mycorrhizal inoculation enhanced fresh weight and dry shoots of mycorrhizal plants under different Zn concentrations. The mycorrhizal inoculation of *T. aestivum* improved the photosynthetic pigment affected by Zn treatments and mycorrhizal colonization decreased as soil Zn increased. On the other hand, the level of minerals of shoots, roots, and grains was greatly influenced by Zn-treatment and by inoculation with *F. geosporum*. Treatment with Zn in the soil increased Cu and Zn concentrations in the root, shoot and grains, however, other minerals (P, S, K, Ca and Fe) decreased. Inoculation of wheat with AM fungi significantly reduced the accumulation of Zn in shoots and grains that diminished the Zn translocation in shoots and grains of wheat. In conclusion, inoculation with a native mycorrhizal taxon (*F. geosporum*) improves yields of wheat under higher levels of Zn and is possible to be applied for the improvement of zinc contaminated.

## Ethics statement

No specific permits were required for the described field studies, as the location where samples were collected is not privately owned or protected. We confirm that the field studies did not involve endangered or protected species. All relevant data are within the paper and its Supporting Information files.

## Supporting information

**S1 Fig.** (A-F) Mycorrhizal colonization of wheat under high levels of zinc, (A-B) Vesicles; (C-D) Arbuscules; (E) Hyphal coils; (F) Extraradical hyphae. (TIF)



## Acknowledgments

We deeply appreciate the kind assistance of Dr. Bhim Pratap Singh (Department of Biotechnology, Mizoram University, India) for his valuable revision of the manuscript and anonymous reviewer for valuable comments for improving the manuscript.

## Author Contributions

**Conceptualization:** Ahmed M. Abdel-Azeem.

**Data curation:** Abdelghafar M. Abu-Elsaoud, Nivien A. Nafady.

**Formal analysis:** Abdelghafar M. Abu-Elsaoud, Nivien A. Nafady, Ahmed M. Abdel-Azeem.

**Investigation:** Abdelghafar M. Abu-Elsaoud, Nivien A. Nafady.

**Methodology:** Abdelghafar M. Abu-Elsaoud, Nivien A. Nafady, Ahmed M. Abdel-Azeem.

**Project administration:** Nivien A. Nafady.

**Writing – original draft:** Abdelghafar M. Abu-Elsaoud, Nivien A. Nafady, Ahmed M. Abdel-Azeem.

**Writing – review & editing:** Abdelghafar M. Abu-Elsaoud, Nivien A. Nafady, Ahmed M. Abdel-Azeem.

## References

1. Tchounwou PB, Yedjou CG, Patlolla AK, Sutton DJ. Heavy Metals Toxicity and the Environment. *EXS*. 2012; 101: 133–164. [https://doi.org/10.1007/978-3-7643-8340-4\\_6](https://doi.org/10.1007/978-3-7643-8340-4_6) PMID: 22945569
2. Abdel-Azeem AM, Abdel-Moneim TS, Ibrahim ME, Hassan M a. A, Saleh MY. Effects of Long-Term Heavy Metal Contamination on Diversity of Terricolous Fungi and Nematodes in Egypt—A Case Study. *Water Air Soil Pollut*. 2007; 186: 233–254. <https://doi.org/10.1007/s11270-007-9480-3>
3. Mudgal V, Madaan N, Mudgal A. Heavy metals in plants: Phytoremediation: Plants used to remediate heavy metal pollution. *Agric Biol J N Am*. 2010; 1: 40–46.
4. Panda SK, Choudhury S. Chromium stress in plants. *Braz J Plant Physiol*. 2005; 17: 95–102. <https://doi.org/10.1590/S1677-04202005000100008>
5. Wang F, Lin X, Yin R. Heavy metal uptake by arbuscular mycorrhizas of *Elsholtzia splendens* and the potential for phytoremediation of contaminated soil. *Plant Soil*. 2005; 269: 225–232. <https://doi.org/10.1007/s11104-004-0517-8>
6. Chaney RL. Zinc Phytotoxicity. In: Robson AD, editor. *Zinc in Soils and Plants*. Springer Netherlands; 1993. pp. 135–150. [https://doi.org/10.1007/978-94-011-0878-2\\_10](https://doi.org/10.1007/978-94-011-0878-2_10)
7. Al Naggar YA, Naiem E-SA, Seif AI, Mona MH. Honey bees and their products as a bio-indicator of environmental pollution with heavy metals. 2013; Available: [http://www.academia.edu/download/34217293/Al\\_Naggar\\_et\\_al\\_2013.pdf](http://www.academia.edu/download/34217293/Al_Naggar_et_al_2013.pdf)
8. Al Naggar YA, Naiem E, Mona M, Giesy JP, Seif A. Metals in agricultural soils and plants in Egypt. *Toxicol Environ Chem*. 2014; 96: 730–742. <https://doi.org/10.1080/02772248.2014.984496>
9. Nordberg GF, Fowler BA, Nordberg M, editors. Copyright. *Handbook on the Toxicology of Metals (Fourth Edition)*. San Diego: Academic Press; 2015. p. iv. <https://doi.org/10.1016/B978-0-444-59453-2.12001-3>
10. Jolly YN, Islam A, Akbar S. Transfer of metals from soil to vegetables and possible health risk assessment. *SpringerPlus*. 2013; 2. <https://doi.org/10.1186/2193-1801-2-385> PMID: 24010043
11. Allsopp D, Seal KJ, Gaylarde CC. *Introduction to biodeterioration*. 2nd ed. Cambridge; New York: Cambridge University Press; 2004.
12. Hough RL, Young SD, Crout NMJ. Modelling of Cd, Cu, Ni, Pb and Zn uptake, by winter wheat and forage maize, from a sewage disposal farm. *Soil Use Manag*. 2003; 19: 19–27. <https://doi.org/10.1079/SUM2002157>
13. Rattan RK, Datta SP, Chhonkar PK, Suribabu K, Singh AK. Long-term impact of irrigation with sewage effluents on heavy metal content in soils, crops and groundwater—a case study. *Agric Ecosyst Environ*. 2005; 109: 310–322. <https://doi.org/10.1016/j.agee.2005.02.025>

14. Smical A-I, Hotea V, Oros V, Juhasz J, Pop E. Studies on Transfer and Bioaccumulation of Heavy Metals from Soil into Lettuce. *Environ Eng Manag J*. 2008; 7: 609–615.
15. Kloke A. Das 'Drei-Bereiche-System' für die Bewertung von Böden mit Schadstoffbelastung. VDLUFA-Schriftenreihe, Kongressband, VDLUFA Verlag, Darmstadt. 1980; 1117–1127.
16. Nriagu JO. Zinc in the Environment. Part I. Ecological Cycling. *Zinc in the Environment Part I Ecological Cycling*. 1980; Available: <https://www.cabdirect.org/cabdirect/abstract/19811958670>
17. Emsley J. Nature's building blocks: an A-Z guide to the elements. New ed., completely rev. and updated. Oxford; New York: Oxford University Press; 2011.
18. Mohamed NA. Nutrients status in some soils as related to Mineralogical Composition. M.Sc., Faculty of Agriculture, Ain Shams University. 1990.
19. Awadalla AA. Mineralogical and physical properties of some soils at EL-Fayoum Governorate and their relation to soil fertility. M.Sc., Cairo University. 1993.
20. El-Sowfy DM. Zinc and manganese status and their relation to some soil properties Fayoum Governorate. M.Sc., Cairo University. 1998.
21. Singh H. Frontmatter. *Mycoremediation*. John Wiley & Sons, Inc.; 2006. pp. i–xxi. <https://doi.org/10.1002/0470050594.fmatter>
22. Singh A, Gauba P. Mycoremediation: A Treatment for Heavy Metal Pollution of Soil. *J Civ Eng Environ Technol*. 2014; 1: 59–61.
23. Abdel-Azeem AM, El-Morsy EM, Nour El-Dein MM, Rashad HM. Occurrence and diversity of mycobiota in heavy metal contaminated sediments of Mediterranean coastal lagoon El-Manzala, Egypt. *Mycosphere*. 2015; 6: 228–240. <https://doi.org/10.5943/mycosphere/6/2/12>
24. Siddiquee S, Rovina K, Azad SA, Naher L, Suryani S, Chaikaew P. Heavy Metal Contaminants Removal from Wastewater Using the Potential Filamentous Fungi Biomass: A Review. *J Microb Biochem Technol*. 2015; 7: 384–393. <https://doi.org/10.4172/1948-5948.1000243>
25. Matsubara M, Lynch JM, De Leij FAAM. A simple screening procedure for selecting fungi with potential for use in the bioremediation of contaminated land. *Enzyme Microb Technol*. 2006; 39: 1365–1372. <https://doi.org/10.1016/j.enzmictec.2005.04.025>
26. Jamal A, Ayub N, Usman M, Khan DAG. Arbuscular Mycorrhizal Fungi Enhance Zinc and Nickel Uptake from Contaminated Soil by Soybean and Lentil. *Int J Phytoremediation*. 2002; 4: 205–221. <https://doi.org/10.1080/15226510208500083>
27. Giasson P, Jaouich A, Gagné S, Moutoglis P. Phytoremediation of zinc and cadmium: A study of arbuscular mycorrhizal hyphae. *Remediat J*. 2005; 15: 113–122. <https://doi.org/10.1002/rem.20064>
28. Denny HJ, Wilkins DA. Zinc tolerance in *Betula* spp. II. Microanalytical studies of zinc uptake into root tissues. *New Phytol*. 1987; 106: 525–534.
29. Tangahu BV, Sheikh Abdullah SR, Basri H, Idris M, Anuar N, Mukhlisin M. A Review on Heavy Metals (As, Pb, and Hg) Uptake by Plants through Phytoremediation. *Int J Chem Eng*. 2011; 2011: e939161. <https://doi.org/10.1155/2011/939161>
30. Vishnoi SR, Srivastava PN. Phytoremediation—Green for Environmental Clean. *Proceedings of Taal2007*. Sengupta, M. and Dalwani, R. (Editors). 2008; 1016–1021.
31. Barot S, Gignoux J. Mechanisms promoting plant coexistence: can all the proposed processes be reconciled? *Oikos*. 2004; 106: 185–192.
32. Silvertown J. The ghost of competition past in the phylogeny of island endemic plants. *J Ecol*. 2004; 92: 168–173.
33. Smith SE, Read DJ. Smith S.E., Read D.J.: *Mycorrhizal Symbiosis* [Internet]. Second edition. San Diego- London -New York—Boston -Sydney -Tokyo—Toronto: Academic Press; 1997. Available: <https://link.springer.com/article/10.1023/A:1000902213906>
34. Wang B, Qiu Y-L. Phylogenetic distribution and evolution of mycorrhizas in land plants. *Mycorrhiza*. 2006; 16: 299–363. <https://doi.org/10.1007/s00572-005-0033-6> PMID: 16845554
35. Lee E-H, Eo J-K, Ka K-H, Eom A-H. Diversity of arbuscular mycorrhizal fungi and their roles in ecosystems. *Mycobiology*. 2013; 41: 121–125. <https://doi.org/10.5941/MYCO.2013.41.3.121> PMID: 24198665
36. Bonfante P, Genre A. Plants and arbuscular mycorrhizal fungi: an evolutionary-developmental perspective. *Trends Plant Sci*. 2008; 13: 492–498. <https://doi.org/10.1016/j.tplants.2008.07.001> PMID: 18701339
37. Abdel Latef AAH, Chaoxing H. Effect of arbuscular mycorrhizal fungi on growth, mineral nutrition, antioxidant enzymes activity and fruit yield of tomato grown under salinity stress. *Sci Hortic*. 2011; 127: 228–233. <https://doi.org/10.1016/j.scienta.2010.09.020>
38. Krishnakumar S, Balakrishnan N, Muthukrishnan R, Kumar SR. Myth and mystery of soil mycorrhiza: A review. *Afr J Agric Res*. 2013; 8: 4706–4717. <https://doi.org/10.5897/AJAR2013.7490>

39. Treseder KK. The extent of mycorrhizal colonization of roots and its influence on plant growth and phosphorus content. *Plant Soil*. 2013; 371: 1–13. <https://doi.org/10.1007/s11104-013-1681-5>
40. Noori A, White JC, Newman LA. Mycorrhizal fungi influence on silver uptake and membrane protein gene expression following silver nanoparticle exposure. *J Nanoparticle Res*. 2017; 19. <https://doi.org/10.1007/s11051-016-3650-4>
41. Mechri B, Tekaya M, Cheheb H, Attia F, Hammami M. Accumulation of flavonoids and phenolic compounds in olive tree roots in response to mycorrhizal colonization: A possible mechanism for regulation of defense molecules. *J Plant Physiol*. 2015; 185: 40–43. <https://doi.org/10.1016/j.jplph.2015.06.015> PMID: 26276403
42. Sharma MP, Reddy UG, Adholeya A. Response of Arbuscular Mycorrhizal Fungi on Wheat (*Triticum aestivum* L.) Grown Conventionally and on Beds in a Sandy Loam Soil. *Indian J Microbiol*. 2011; 51: 384–389. <https://doi.org/10.1007/s12088-011-0134-1> PMID: 22754021
43. Pellegrino E, Öpik M, Bonari E, Ercoli L. Responses of wheat to arbuscular mycorrhizal fungi: A meta-analysis of field studies from 1975 to 2013. *Soil Biol Biochem*. 2015; 84: 210–217. <https://doi.org/10.1016/j.soilbio.2015.02.020>
44. Zayed MS, Hassanein MKK, Esa NH, Abdallah MMF. Productivity of pepper crop (*Capsicum annum* L.) as affected by organic fertilizer, soil solarization, and endomycorrhizae. *Ann Agric Sci*. 2013; 58: 131–137. <https://doi.org/10.1016/j.aosas.2013.07.011>
45. Khabou W, Hajji B, Zouari M, Rigane H, Abdallah FB. Arbuscular mycorrhizal fungi improve growth and mineral uptake of olive tree under gypsum substrate. *Ecol Eng*. 2014; 73: 290–296. <https://doi.org/10.1016/j.ecoleng.2014.09.054>
46. Yang Y, Song Y, Scheller HV, Ghosh A, Ban Y, Chen H, et al. Community structure of arbuscular mycorrhizal fungi associated with *Robinia pseudoacacia* in uncontaminated and heavy metal contaminated soils. *Soil Biol Biochem*. 2015; 86: 146–158. <https://doi.org/10.1016/j.soilbio.2015.03.018>
47. Liu H, Yuan M, Tan S, Yang X, Lan Z, Jiang Q, et al. Enhancement of arbuscular mycorrhizal fungus (*Glomus versiforme*) on the growth and Cd uptake by Cd-hyperaccumulator *Solanum nigrum*. *Appl Soil Ecol*. 2015; 89: 44–49. <https://doi.org/10.1016/j.apsoil.2015.01.006>
48. Firmin S, Labidi S, Fontaine J, Laruelle F, Tisserant B, Nsanganwimana F, et al. Arbuscular mycorrhizal fungal inoculation protects *Miscanthus × giganteus* against trace element toxicity in a highly metal-contaminated site. *Sci Total Environ*. 2015; 527–528: 91–99. <https://doi.org/10.1016/j.scitotenv.2015.04.116> PMID: 25958358
49. Judy JD, Bertsch PM. Bioavailability, Toxicity, and Fate of Manufactured Nanomaterials in Terrestrial Ecosystems. *Advances in Agronomy*. Elsevier; 2014. pp. 1–64. <https://doi.org/10.1016/B978-0-12-420225-2.00001-7>
50. Piper CS. *Soil and Plant Analysis*. 1950.
51. Jackson ML (1967) *Soil Chemical Analysis*. Prentice Hall of India Pvt. Ltd., New Delhi, p. 205.
52. Wright CH. *Soil Analysis: A handbook of physical and chemical methods*. London: Thomas-Murty and Co.; 1939.
53. Page AL, editor. *Methods of Soil Analysis. Part 2. Chemical and Microbiological Properties* [Internet]. Madison, WI: American Society of Agronomy, Soil Science Society of America; 1982. <https://doi.org/10.2134/agronmonogr9.2.2ed>
54. USEPA. *Quality criteria for water*. Springfield, Virginia: US Department of Commerce, National Technical Information Service, US Environmental Protection Agency; 1986.
55. Gerdemann JW, Nicolson TH. Spores of mycorrhizal Endogone species extracted from soil by wet sieving and decanting. *Trans Br Mycol Soc*. 1963; 46: 235–244. [https://doi.org/10.1016/S0007-1536\(63\)80079-0](https://doi.org/10.1016/S0007-1536(63)80079-0)
56. Trappe JM, Molina R. Taxonomy and genetics of mycorrhizal fungi: their interactions and relevance. *Proceeding of the 1st European Symposium on Mycorrhiza*. Paris: /INRA; 1986. pp. 133–146. Available: <http://agris.fao.org/agris-search/search.do?recordID=FR8703620>
57. Morton JB (West VU, Benny GL. Revised classification of arbuscular mycorrhizal fungi (Zygomycetes): a new order, Glomales, two new suborders, Glomineae and Gigasporineae, and two new families, Acaulosporaceae and Gigasporaceae, with an emendation of Glomaceae. *Mycotaxon USA*. 1990; Available: <http://agris.fao.org/agris-search/search.do?recordID=US9036713>
58. Schüßler A, Schwarzott D, Walker C. A new fungal phylum, the Glomeromycota: phylogeny and evolution\* \*Dedicated to Manfred Kluge (Technische Universität Darmstadt) on the occasion of his retirement. *Mycol Res*. 2001; 105: 1413–1421. <https://doi.org/10.1017/S0953756201005196>
59. Walker C, Schüssler A. Nomenclatural clarifications and new taxa in the Glomeromycota. *Mycological Research*. Mycological Research. 2004; 979–982.

60. Phillips JM, Hayman DS. Improved procedures for clearing roots and staining parasitic and vesicular-arbuscular mycorrhizal fungi for rapid assessment of infection. *Trans Br Mycol Soc.* 1970; 55: 158-181. [https://doi.org/10.1016/S0007-1536\(70\)80110-3](https://doi.org/10.1016/S0007-1536(70)80110-3)
61. Hildebrandt U, Regvar M, Bothe H. Arbuscular mycorrhiza and heavy metal tolerance. *Phytochemistry.* 2007; 68: 139–146. <https://doi.org/10.1016/j.phytochem.2006.09.023> PMID: 17078985
62. Abbott LK, Robson AD, Gazey C. Selection of Inoculant Vesicular-arbuscular Mycorrhizal Fungi. *Methods Microbiol.* 1992; 24: 1–21. [https://doi.org/10.1016/S0580-9517\(08\)70084-9](https://doi.org/10.1016/S0580-9517(08)70084-9)
63. Nejat N, Sadeghi H. Finding out Relationships Among Some Morpho-Biochemical Parameters of Christ's Thorn (*Ziziphus spina-christi*) under Drought and Salinity Stresses. *Planta Daninha.* 2016; 34: 667–674. <https://doi.org/10.1590/s0100-83582016340400006>
64. Yousif SA, Jasim H, Abas AR, Yousef DP. Some Yield Parameters of Wheat Genotypes. *World Acad Sci Eng Technol Int J Biol Biomol Agric Food Biotechnol Eng.* 2015; 9: 323–326.
65. Lichtenthaler HK. [34] Chlorophylls and carotenoids: Pigments of photosynthetic biomembranes. *Methods Enzymol.* 1987; 148: 350–382. [https://doi.org/10.1016/0076-6879\(87\)48036-1](https://doi.org/10.1016/0076-6879(87)48036-1)
66. Williams ML, Thomas BJ, Farrar JF, Pollock CJ. Visualizing the distribution of elements within barley leaves by energy dispersive X-ray image maps (EDX maps). *New Phytol.* 1993; 125: 367–372. <https://doi.org/10.1111/j.1469-8137.1993.tb03888.x>
67. Küpper H, Lombi E, Zhao FJ, McGrath SP. Cellular compartmentation of cadmium and zinc in relation to other elements in the hyperaccumulator *Arabidopsis halleri*. *Planta.* 2000; 212: 75–84. <https://doi.org/10.1007/s004250000366> PMID: 11219586
68. Yang Y, Ge Y, Zeng H, Zhou X, Peng L, Zeng Q. Phytoextraction of cadmium-contaminated soil and potential of regenerated tobacco biomass for recovery of cadmium. *Sci Rep.* 2017; 7. <https://doi.org/10.1038/s41598-017-05834-8> PMID: 28775260
69. Trouvelot A, Kough JL, Gianinazzi-Pearson V. Estimation of VA mycorrhizal infection levels. Research for methods having a functional significance. *Proceeding of the 1st European Symposium on Mycorrhiza.* Station d'Amelioration des Plantes, Paris; 1986. pp. 217–221. Available: <http://agris.fao.org/agris-search/search.do?recordID=FR8703627>
70. MYCOCALC. Mycocalc [Internet]. 2017 [cited 23 Apr 2017]. Available: <https://www2.dijon.inra.fr/mychintec/Mycocalc-prg/download.html>
71. Madhava Rao KV, Sresty TVS. Antioxidative parameters in the seedlings of pigeonpea (*Cajanus cajan* (L.) Millspaugh) in response to Zn and Ni stresses. *Plant Sci.* 2000; 157: 113–128. [https://doi.org/10.1016/S0168-9452\(00\)00273-9](https://doi.org/10.1016/S0168-9452(00)00273-9) PMID: 10940475
72. Shao H-B, ZongSuo L, MingAn S. Changes of anti-oxidative enzymes and MDA content under soil water deficits among 10 wheat (*Triticum aestivum* L.) genotypes at maturation stage. *Colloids Surf B Biointerfaces.* 2005; 45: 7–13. <https://doi.org/10.1016/j.colsurfb.2005.06.016> PMID: 16102947
73. Sánchez-Blanco MJ, Ferrández T, Morales MA, Morte A, Alarcón JJ. Variations in water status, gas exchange, and growth in *Rosmarinus officinalis* plants infected with *Glomus deserticola* under drought conditions. *J Plant Physiol.* 2004; 161: 675–682. <https://doi.org/10.1078/0176-1617-01191> PMID: 15266714
74. Wu Q-S, Xia R-X. Arbuscular mycorrhizal fungi influence growth, osmotic adjustment and photosynthesis of citrus under well-watered and water stress conditions. *J Plant Physiol.* 2006; 163: 417–425. <https://doi.org/10.1016/j.jplph.2005.04.024> PMID: 16455355
75. Böhm F, Edge R, Truscott G. Interactions of dietary carotenoids with activated (singlet) oxygen and free radicals: potential effects for human health. *Mol Nutr Food Res.* 2012; 56: 205–216. <https://doi.org/10.1002/mnfr.201100222> PMID: 22162194
76. Roach T, Krieger-Liszskay AK. Regulation of Photosynthetic Electron Transport and Photoinhibition. *Curr Protein Pept Sci.* 2014; 15: 351–362. <https://doi.org/10.2174/1389203715666140327105143> PMID: 24678670
77. Mathur N, Vyas A. I. Influence of VA Mycorrhizae on Net Photosynthesis and Transpiration of *Ziziphus mauritiana*. *J Plant Physiol.* 1995; 147: 328–330. [https://doi.org/10.1016/S0176-1617\(11\)82161-9](https://doi.org/10.1016/S0176-1617(11)82161-9)
78. Samreen T, Humaira, Shah HU, Ullah S, Javid M. Zinc effect on growth rate, chlorophyll, protein and mineral contents of hydroponically grown mungbeans plant (*Vigna radiata*). *Arab J Chem.* 2013; <https://doi.org/10.1016/j.arabjc.2013.07.005>
79. Zhu Y-G, Smith SE, Smith FA. Zinc (Zn)-phosphorus (P) Interactions in Two Cultivars of Spring Wheat (*Triticum aestivum* L.) Differing in P Uptake Efficiency. *Ann Bot.* 2001; 88: 941–945. <https://doi.org/10.1006/anbo.2001.1522>
80. Loneragan JF, Webb MJ. Interactions between zinc and other nutrients affecting the growth of plants. *Zinc in soils and plants.* Springer; 1993. pp. 119–134. Available: [http://link.springer.com/chapter/10.1007/978-94-011-0878-2\\_9](http://link.springer.com/chapter/10.1007/978-94-011-0878-2_9)

81. Rajaie M, Ejraie AK, Owliaie HR, Tavakoli AR. Effect of zinc and boron interaction on growth and mineral composition of lemon seedlings in a calcareous soil. *Int J Plant Prod.* 2009; 3: 39–50.
82. Al-Karakis GN. Benefit, Cost, and Phosphorus Use Efficiency of Mycorrhizal Field-Grown Garlic at Different Soil Phosphorus Levels. *J Plant Nutr.* 2002; 25: 1175–1184. <https://doi.org/10.1081/PLN-120004381>
83. Malekzadeh P, Khara J, Farshian S. Effect of Arbuscular Mycorrhiza (*Glomus etunicatum*) on some physiological growth parameters of tomato plant under copper toxicity in solution. *Pak J Biol Sci PJBS.* 2007; 10: 1326–1330. PMID: [19069938](https://pubmed.ncbi.nlm.nih.gov/19069938/)
84. Berruti A, Lumini E, Balestrini R, Bianciotto V. Arbuscular Mycorrhizal Fungi as Natural Biofertilizers: Let's Benefit from Past Successes. *Front Microbiol.* 2016; 6: 1559. <https://doi.org/10.3389/fmicb.2015.01559> PMID: [26834714](https://pubmed.ncbi.nlm.nih.gov/26834714/)
85. Dag A, Yermiyahu U, Ben-Gal A, Zipori I, Kapulnik Y. Nursery and post-transplant field response of olive trees to arbuscular mycorrhizal fungi in an arid region. *Crop Pasture Sci.* 2009; 60: 427–433. <https://doi.org/10.1071/CP08143>
86. Garcia K, Zimmermann SD. The role of mycorrhizal associations in plant potassium nutrition. *Front Plant Sci.* 2014; 5. <https://doi.org/10.3389/fpls.2014.00337> PMID: [25101097](https://pubmed.ncbi.nlm.nih.gov/25101097/)
87. Hildebrandt U, Kaldorf M, Bothe H. The Zinc Violet and its Colonization by Arbuscular Mycorrhizal Fungi. *J Plant Physiol.* 1999; 154: 709–717. [https://doi.org/10.1016/S0176-1617\(99\)80249-1](https://doi.org/10.1016/S0176-1617(99)80249-1)
88. Kaldorf M, Kuhn AJ, Schröder WH, Hildebrandt U, Bothe H. Selective Element Deposits in Maize Colonized by a Heavy Metal Tolerance Conferring Arbuscular Mycorrhizal Fungus. *J Plant Physiol.* 1999; 154: 718–728. [https://doi.org/10.1016/S0176-1617\(99\)80250-8](https://doi.org/10.1016/S0176-1617(99)80250-8)
89. Pacovsky RS. Micronutrient uptake and distribution in mycorrhizal or phosphorus-fertilized soybeans. *Plant Soil.* 1986; 95: 379–388. <https://doi.org/10.1007/BF02374618>
90. Pfeiffer CM, Bloss HE. Growth and Nutrition of Guayule (*Parthenium argentatum*) in a Saline Soil as Influenced by Vesicular-Arbuscular Mycorrhiza and Phosphorus Fertilization. *New Phytol.* 1988; 108: 315–321.
91. Joner E, Leyval C. Time-course of heavy metal uptake in maize and clover as affected by root density and different mycorrhizal inoculation regimes. *Biol Fertil Soils.* 2001; 33: 351–357. <https://doi.org/10.1007/s003740000331>
92. Gianinazzi S, Schüepp H, Barea JM, Haselwandter K, editors. *Mycorrhizal Technology in Agriculture: From Genes to Bioproducts* [Internet]. Basel: Birkhäuser Basel; 2002. <https://doi.org/10.1007/978-3-0348-8117-3>
93. Soares CRFS, Siqueira JO. Mycorrhiza and phosphate protection of tropical grass species against heavy metal toxicity in multi-contaminated soil. *Biol Fertil Soils.* 2008; 44: 833–841. <https://doi.org/10.1007/s00374-007-0265-z>
94. Amir H, Lagrange A, Hassaïne N, Cavaloc Y. Arbuscular mycorrhizal fungi from New Caledonian ultramafic soils improve tolerance to nickel of endemic plant species. *Mycorrhiza.* 2013; 23: 585–595. <https://doi.org/10.1007/s00572-013-0499-6> PMID: [23588949](https://pubmed.ncbi.nlm.nih.gov/23588949/)
95. Navarro-Ródenas A, Bárzana G, Nicolás E, Carra A, Schubert A, Morte A. Expression analysis of aquaporins from desert truffle mycorrhizal symbiosis reveals a fine-tuned regulation under drought. *Mol Plant-Microbe Interact MPMI.* 2013; 26: 1068–1078. <https://doi.org/10.1094/MPMI-07-12-0178-R> PMID: [23656332](https://pubmed.ncbi.nlm.nih.gov/23656332/)
96. Birhane E, Sterck FJ, Fetene M, Bongers F, Kuyper TW. Arbuscular mycorrhizal fungi enhance photosynthesis, water use efficiency, and growth of frankincense seedlings under pulsed water availability conditions. *Oecologia.* 2012; 169: 895–904. <https://doi.org/10.1007/s00442-012-2258-3> PMID: [22286084](https://pubmed.ncbi.nlm.nih.gov/22286084/)
97. Al-Karaki GN. The Role of Mycorrhiza in the Reclamation of Degraded Lands in Arid Environments. In: Shahid SA, Taha FK, Abdelfattah MA, editors. *Developments in Soil Classification, Land Use Planning and Policy Implications.* Springer Netherlands; 2013. pp. 823–836. [https://doi.org/10.1007/978-94-007-5332-7\\_48](https://doi.org/10.1007/978-94-007-5332-7_48)
98. Marschner H. *Marschner's Mineral Nutrition of Higher Plants.* Academic Press; 2012.
